## **Meta-analysis of Reward Processing in Major Depressive Disorder Reveals Distinct Abnormalities within the Reward Circuit**

Tommy H. Ng, Lauren B. Alloy, & David V. Smith  
Department of Psychology, Temple University, Philadelphia, PA, USA

Corresponding Author:

David V. Smith, Ph.D.  
Assistant Professor of Psychology  
Temple University  
Weiss Hall, Room 825  
1701 North 13th Street  
Philadelphia, PA 19122  
Office Phone: 215-204-1552  
Email: [david.v.smith@temple.edu](mailto:david.v.smith@temple.edu)

## Abstract

Many neuroimaging studies have investigated reward processing dysfunction in major depressive disorder (MDD). These studies have led to the common idea that MDD is associated with blunted reward-related responses, particularly in the ventral striatum (VS). Yet, the link between MDD and reward-related responses in other regions remains inconclusive, thus limiting our understanding of the pathophysiology of MDD. To address this issue, we performed a coordinate-based meta-analysis of 41 neuroimaging studies encompassing reward-related responses from a total of 794 patients with MDD and 803 healthy controls. Our findings argue against the idea that MDD is linked to a monolithic deficit within the reward system. Instead, our results demonstrate that MDD is associated with opposing abnormalities in the reward circuit: hypo-responses in the VS and hyper-responses in the orbitofrontal cortex. These findings help to reconceptualize our understanding of reward processing abnormalities in MDD and suggest a role for dysregulated corticostriatal connectivity.

## Introduction

Depression is a prevalent mental disorder ranked as the leading non-fatal cause of disability by the World Health Organization (Friedrich, 2017; World Health Organization, 2017). Therefore, it is of paramount importance to understand its underlying neurobiological mechanisms. Over the past decade, theorists have proposed that anhedonia, one of the core symptoms of depression, is linked to reward processing dysfunction (Alloy et al., 2016; Heshmati and Russo, 2015; Nusslock and Alloy, 2017; Olinio, 2016; Olinio et al., 2014, 2011; Pizzagalli, 2014; Robbins, 2016; Treadway and Zald, 2011; Whitton et al., 2015). In particular, many neuroimaging studies have reported reduced activity in the ventral striatum (VS) in response to reward in individuals with major depressive disorder (MDD) as compared with healthy controls (HCs; Arrondo et al., 2015; Knutson et al., 2008; Luking et al., 2016; McCabe et al., 2009; Pizzagalli et al., 2009; Smoski et al., 2009)(Arrondo et al., 2015; Knutson et al., 2008; McCabe et al., 2009; Pizzagalli et al., 2009; Smoski et al., 2009).

The striatum, which can be divided into dorsal and ventral sections, is the primary input zone for basal ganglia (Haber, 2016; Haber and Knutson, 2010). It receives afferent projections from the midbrain, amygdala, and prefrontal cortex (PFC), such as the orbitofrontal cortex (OFC), dorsolateral prefrontal cortex (dlPFC), ventromedial prefrontal cortex (vmPFC), and anterior cingulate cortex (ACC; Haber, 2016; Haber and Knutson, 2010). It also projects to such regions as the ventral pallidum, ventral tegmental area, and substantia nigra (Haber and Knutson, 2010). Many of the regions linked to the striatum, particularly prefrontal regions, have been associated with the computation and representation of reward value (Berridge and Kringelbach, 2015; Der-Avakian and Markou, 2012; Kringelbach, 2005; Levy and Glimcher, 2012; Padoa-Schioppa, 2011; Padoa-Schioppa and Conen, 2017; Rangel et al., 2008; Saez et al., 2017; Smith and Delgado, 2015; Smith and Huettel, 2010; Stalnaker et al., 2015; Wang et al., 2016), as well as the regulation of affect

and reward-related behavior in animals and healthy individuals (Delgado et al., 2016; Ferenczi et al., 2016; Peters and Büchel, 2010; Phelps et al., 2014; Voorn et al., 2004). The striatum also has long been proposed to play an important role in the onset and course of MDD, with longitudinal studies demonstrating that blunted VS activation during reward anticipation predicts the emergence of depressive symptoms and disorder (Morgan et al., 2013; Stringaris et al., 2015) and deep-brain stimulation studies using it as a treatment target for treatment-resistant depression (Dougherty et al., 2015; Malone et al., 2009).

Although blunted striatal response to reward in MDD is a well-established finding in the literature (Groenewold et al., 2013; Hanson et al., 2015; Heshmati and Russo, 2015; Whitton et al., 2015; Zhang et al., 2013), it is less clear how other regions, particularly the PFC, also may contribute to reward processing deficits in MDD. For instance, some studies have found that relative to HCs, MDD exhibited greater activation in the OFC (Forbes et al., 2006; Smoski et al., 2009), dlPFC (Demenescu et al., 2011; Pizzagalli et al., 2009), vmPFC (Keedwell et al., 2005; Rizvi et al., 2013), ACC (Dichter et al., 2012; Mitterschiffthaler et al., 2003), middle frontal gyrus (Dichter et al., 2012; Keedwell et al., 2005), inferior frontal gyrus (Kumari et al., 2003; Mitterschiffthaler et al., 2003), subgenual cingulate (Kumari et al., 2003; Rizvi et al., 2013), and dorsomedial prefrontal cortex (Keedwell et al., 2005) during the processing of rewarding stimuli. In contrast, other studies have reported less activity in MDD in response to reward in the OFC (Dichter et al., 2012; Forbes et al., 2006), ACC (Forbes et al., 2006; Kumari et al., 2003; Pizzagalli et al., 2009; Smoski et al., 2009), middle frontal gyrus (Kumari et al., 2003; Mitterschiffthaler et al., 2003; Smoski et al., 2009), and frontal pole (Dichter et al., 2012). The inconsistencies may be due to a number of factors, such as limited statistical power (Button et al., 2013; Jia et al., 2018; Poldrack et al., 2017) and susceptibility artifacts in the PFC (Andersson et al., 2001; Chase et al., 2015; Delgado et al., 2016; Ojemann et al., 1997). Therefore, the association between prefrontal regions and

MDD remains equivocal, both in terms of the *direction* (i.e., hyper- or hypo-responses) and the *location* of the effect (e.g., OFC, dlPFC, vmPFC and/or ACC).

Inconsistencies in the literature have prompted researchers to conduct coordinate-based meta-analyses to identify common activation patterns implicated in MDD during reward processing (Groenewold et al., 2013; Keren et al., 2018; Zhang et al., 2013).

Although prior meta-analytic efforts have shown some overlapping findings in the striatum, we note that there is a striking degree of anatomical disagreement across these efforts, with non-overlapping findings all throughout the brain (see Table S1 and Figure S1 for a complete comparison of findings across studies). The lack of agreement across studies can be due to methodological issues, such as lenient thresholding, overlapping samples, software issues (Eickhoff et al., 2017), and inclusion of region-of-interest (ROI) coordinates, as detailed in a previous review (Muller et al., 2016). For example, two previous meta-analyses (Groenewold et al., 2013; Zhang et al., 2013) corrected for multiple comparisons using the false discovery rate (FDR) approach, which has been shown to be inadequate in controlling the false positives among clusters in neuroimaging meta-analyses (Chumbley and Friston, 2009; Eickhoff et al., 2012) and might have contributed to the lack of agreement across studies.

To address these issues and extend extant work, we performed a coordinate-based meta-analysis following procedures recommended by new guidelines (Barch and Pagliaccio, 2017; Muller et al., 2017, 2016). The current work differed from previous meta-analyses on reward processing in MDD in various aspects, such as only including whole-brain studies to avoid localization bias; only including studies that used an active control condition to isolate reward-related processes; only including independent samples to avoid double counting the same participants; using more stringent thresholding criteria; having the most up-to-date literature search; and only conducting a meta-analysis when there were at least 17 eligible

experiments to ensure adequate statistical power and restrict excessive contribution of any particular studies to cluster-level thresholding (Eickhoff et al., 2016).

Our primary hypothesis was that the literature would consistently show that compared with HCs, individuals with MDD would exhibit blunted activation of the striatum and abnormal activation of the prefrontal regions (e.g., the OFC) during the processing of rewarding stimuli. We also explored whether there were consistent neural responses to punishing stimuli in MDD relative to HCs. To examine these hypotheses, we conducted four separate coordinate-based meta-analyses testing spatial convergence of neuroimaging findings for the following four contrasts: 1) positive valence (reward > punishment/neutral stimuli or neutral stimuli > punishment) for MDD > HC; 2) negative valence (punishment > reward/neutral stimuli or neutral stimuli > reward) for MDD > HC; 3) positive valence for HC > MDD; 4) negative valence for HC > MDD. The comprehensive nature of the current meta-analysis allowed us to investigate whether a quantitative synthesis of neuroimaging studies on reward processing dysfunction in MDD would unveil common activation patterns that may be difficult to discern by individual studies due to inconsistent findings. We aimed to address two main questions. First, which brain regions show consistent hypo-responses to reward-relevant stimuli in MDD relative to HCs? Second, which brain regions show consistent hyper-responses to reward-relevant stimuli in MDD relative to HCs?

## **Materials and Methods**

### **Study Selection**

The current coordinate-based meta-analysis primarily followed the guidelines for meta-analyses, whenever applicable (Moher et al., 2009; Muller et al., 2017). We conducted a systematic literature search to identify neuroimaging studies on reward processing

abnormalities in mood disorders (Figure 1). Potentially eligible studies published between 1/1/1997 and 8/7/2018 were identified by searching the MEDLINE, EMBASE, PsycINFO, PsycARTICLES, Scopus, and Web of Science using the grouped terms (fMRI\* or PET\*) AND (depress\* OR bipolar\* OR mania\* OR manic\* OR hypomania\* OR hypomanic\*) AND (reward\* OR effort\* OR decision\* OR reinforce\* OR habit\* OR discounting\* OR “prediction error” OR “delayed gratification” OR “approach motivation” OR “positive valence systems”). To enhance search sensitivity, the reference lists of the retrieved articles and review papers were further checked to identify potentially relevant articles. Although our initial goal was to investigate reward processing dysfunction in both MDD and bipolar disorder, the current meta-analysis only focused on MDD due to an inadequate number of studies on bipolar disorder (the search identified 23 studies on bipolar disorder across positive and negative valence contrasts, yielding fewer than 17 experiments for each targeted meta-analysis).

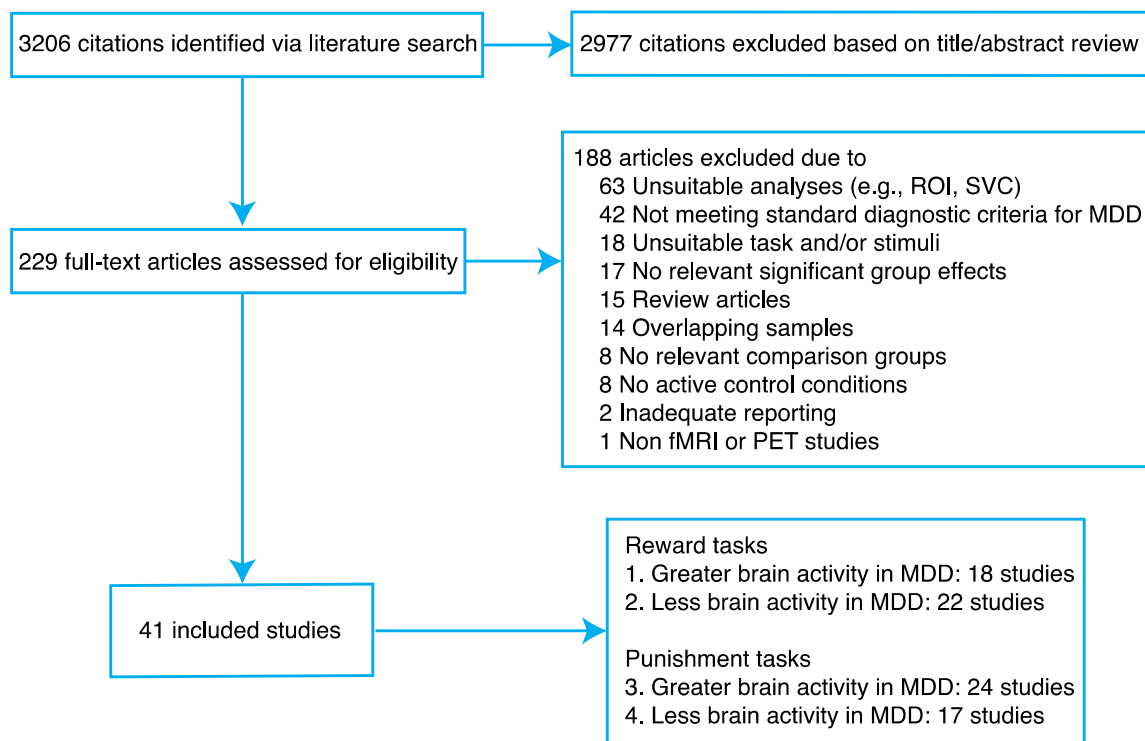

**Figure 1.** Flowchart of study selection. Our systematic literature search identified a total of 41 neuroimaging studies that met our inclusion criteria, yielding 4 coordinate-based meta-analyses with at least 17 independent studies; ROI, region of interest; SVC, small volume correction; MDD, major depressive disorder.

### **Inclusion Criteria**

We included studies that (a) used a reward and/or punishment task, (b) reported comparisons between people with MDD and HCs, (c) used standardized diagnostic criteria (e.g., DSM-IV, DSM-IV-TR, ICD-10) to determine psychiatric diagnoses, (d) used fMRI or PET in conjunction with parametric analysis or subtraction methodology contrasting an experimental condition and an active control condition (e.g., a punishment condition, a lower-intensity reward condition, or a neutral condition) to isolate reward-related processes and identify foci of task-related neural changes, (e) reported significant results of whole-brain group analyses without small volume corrections (SVC), as non-whole-brain coordinates [e.g., region of interest (ROI)-based coordinates] and analyses involving SVC have been argued to bias coordinate-based meta-analyses (Eickhoff et al., 2016; Muller et al., 2017), (f) reported coordinates in a standard stereotactic space [Talairach or Montreal Neurological Institute (MNI) space], and (g) used independent samples.

The study with the largest sample size was included if there was sample overlap between studies. Reward tasks were operationalized as involving presentation of a rewarding stimulus (e.g., winning money, favorite music, positive faces), whereas punishment tasks were operationalized as involving presentation of a punishing stimulus (e.g., losing money, negative faces). The stimuli used in the included studies of the meta-analysis reflect both a reward-punishment continuum and a positive-negative continuum. For example, although positive faces are traditionally considered only as positive stimuli, we considered them as



rewards, based on previous research showing that positive faces activate the reward circuitry, that they are discounted as a function of time, that they are tradable for other rewards (e.g., money), that they reinforce work, and that people are willing to work to view positive faces and exert more effort for more positive faces (e.g., Hayden et al., 2007; Krach et al., 2010; Tsukiura and Cabeza, 2008).

### **Coordinate-Based Meta-Analysis**

Coordinate-based meta-analyses were performed using GingerALE 2.3.6 (<http://brainmap.org>), which employs the activation likelihood estimation (ALE) method (Eickhoff et al., 2012; Laird et al., 2005; Turkeltaub et al., 2012). The ALE method aims to identify regions showing spatial convergence between experiments and tests against the null hypothesis that the foci of experiments are uniformly and randomly distributed across the brain (Eickhoff et al., 2012). It treats foci from individual experiments as centers for 3D Gaussian probability distributions representing spatial uncertainty. The width of these distributions was determined based on between-subject and between-template variability (Eickhoff et al., 2009). The ALE algorithm weighs the between-subject variability by the number of participants for each study, based on the idea that experiments of larger sample sizes are more likely to reliably report true activation effects. Therefore, experiments with larger sample sizes are modeled by smaller Gaussian distributions, resulting in a stronger influence on ALE scores, which indicate the probability that at least one true peak activation lies in the voxel across the population of all possible studies (Eickhoff et al., 2009).

The ALE method is implemented in the following steps. First, for each included study, a map of the activation likelihood is computed. Second, the maps are aggregated to compute the ALE score for each voxel. Finally, a permutation test is employed to identify voxels in which the ALE statistic is larger than expected by chance (Eickhoff et al., 2009, 2012; Laird et al., 2005; Turkeltaub et al., 2012). The ALE method takes into account

heterogeneity in spatial uncertainty across studies (Eickhoff et al., 2009, 2012; Turkeltaub et al., 2012) and differences in number of peak coordinates reported per cluster (Turkeltaub et al., 2012). This approach allows random-effects estimates of ALE, increasing generalizability of the results (Eickhoff et al., 2009).

It is important to note that coordinate-based meta-analyses represent a departure from traditional meta-analyses (Fox et al., 1998; Muller et al., 2017). Specifically, whereas traditional meta-analyses aim to calculate pooled effect sizes to determine the direction and magnitude of an effect based on a body of literature, coordinate-based meta-analyses evaluate whether the location of an effect is consistent within a body of literature (e.g., whether studies that examined blunted responses to reward in MDD consistently implicate the VS). In other words, coordinate-based meta-analyses are blind to effect size magnitude, but direction is tied to the analysis (Fox et al., 1998; Muller et al., 2017).

### **Statistical Analysis**

Given the inconsistency of findings in the literature of reward processing abnormalities in MDD, we used a coordinate-based meta-analytic approach and activation likelihood estimation (Eickhoff et al., 2012, 2009) to examine whether we could identify consistent activation patterns across studies. Our main analyses focused on examining which brain regions show consistent hypo- or hyper-responses to reward in MDD relative to HCs. We also conducted exploratory analyses to investigate which brain regions consistently show aberrant responses to punishment in MDD relative to HCs. Our analyses were limited to four independent contrasts: 1) positive valence (reward > punishment/neutral stimuli or neutral stimuli > punishment) for MDD > HC; 2) negative valence (punishment > reward/neutral stimuli or neutral stimuli > reward) for MDD > HC; 3) positive valence for HC > MDD; 4) negative valence for HC > MDD. Assessing these contrasts in separate coordinate-based meta-analyses is essential for characterizing reward-processing abnormalities in MDD.

Indeed, this approach is adopted by many ALE meta-analyses of studies that compare a psychiatric group with a healthy control group (e.g., Delvecchio et al., 2013; Muller et al., 2016; Zhang et al., 2013)

To ensure adequate statistical power and limit the possibility that a meta-analytic effect is driven by a small set of studies (Eickhoff et al., 2016; Smith and Delgado, 2017), we only conducted a meta-analysis if there was at least 17 independent studies available for analysis. We also took steps to minimize within-group effects on the meta-analyses (Turkeltaub et al., 2012). If a study reported more than one contrast (often referred to as an “experiment” in meta-analyses), the contrasts examining similar processes were pooled together to avoid double counting the same participants in a meta-analysis. For example, when a study reported between-group effects in response to \$1.50 and \$5 rewards relative to neutral or loss conditions, the coordinates derived from the two contrasts were coded as a single reward experiment.

All analyses were performed in Montreal Neurological Institute (MNI) space. Coordinates reported in Talairach space were converted to MNI using the “icbm2tal” transformation (Lancaster et al., 2007). We assessed statistical significance and corrected for multiple comparisons using the permutation-based approach ( $N = 1000$ ) recommended by the developers of GingerALE (Eickhoff et al., 2016, 2017). This approach utilized a cluster-forming threshold of  $P < 0.001$  (uncorrected) and maintained a cluster-level family-wise error rate of 5% (Eickhoff et al., 2016). To capture anatomical variation between individual human brains (Mazziotta et al., 1995), we show probabilistic anatomical labels for the locations of the maximum ALE values using the Harvard–Oxford cortical and subcortical atlases (Desikan et al., 2006). For transparency, all of our statistical maps (thresholded and unthresholded) derived from the meta-analyses are publicly available on NeuroVault

(<https://neurovault.org/collections/3884/>). Readers are free to access these maps and define these regions using their own labels.

## Results

As shown in Figure 1, our systematic literature search identified a total of 41 neuroimaging studies that met our inclusion criteria, yielding 4 coordinate-based meta-analyses with at least 17 independent experiments. Tables S2 and S3 show the characteristics of the included studies and their samples. In the present meta-analytic dataset, for the MDD group, the mean number of participants was 19.9, the mean age was 36.4, the mean percentage of females was 60.9%, and the mean percentage of medication usage was 36.6%. For the HC group, the mean number of participants was 20.1, the mean age was 34.9, and the mean percentage of females was 60.3%. Types of reward or punishment used by the included studies encompass money, points, or voucher (41.5%; 17/41); faces (34.1%; 14/41); pictures (12.2%; 5/41); words, statements, captions, or paragraphs (12.2%; 5/41); and autobiographical memory (4.9%; 2/41). 41.5% (17/41) of studies reported both reward and punishment contrasts; 29.3% (12/41) of studies reported punishment contrasts only; and 26.8% (11/41) of studies reported reward contrasts only.

### Aberrant Reward and Punishment Responses in MDD

We first synthesized results of 22 studies reporting less activity in response to reward in people with MDD than HCs (i.e.  $HC > MDD$  for reward  $>$  punishment/neutral stimuli or neutral stimuli  $>$  punishment). As expected, our results indicated that these studies reliably reported less activation in a single cluster extending bilaterally across the VS and including part of the subcallosal cortex in MDD (Table 1; Figure 2a).

In addition to examining which regions consistently showed hypo-responses to reward, we also examined which, if any, brain regions showed consistent hyper-responses to reward-relevant stimuli. We aggregated results of 18 studies reporting greater activity in

response to reward in people with MDD than HCs (i.e. MDD > HC for reward > punishment/neutral stimuli or neutral stimuli > punishment). Importantly, our results indicated that these studies reliably reported greater activation in the right OFC in MDD (Table 1; Figure 2b). Taken together, these results suggest that relative to HCs, people with MDD exhibited hypo-responses in the VS and, more importantly, hyper-responses in the OFC to rewarding stimuli.

We conducted sensitivity analyses to examine whether excluding studies that used neutral stimuli > punishment as a reward contrast would affect the main results related to reward responses in MDD. The analyses revealed that the results remained the same (see supplementary materials for details). We also conducted exploratory analyses to examine which brain regions consistently show aberrant responses to punishment in MDD relative to HCs. Results are detailed in supplementary materials.

**Table 1.** Peak Coordinates of Group Differences in Neural Responses to Reward.

| Contrast | Cluster Size (mm <sup>3</sup> ) | Probabilistic Anatomical Label                                    | x       | y      | z        |
|----------|---------------------------------|-------------------------------------------------------------------|---------|--------|----------|
| MDD > HC | 912                             | Frontal Orbital Cortex (26%),<br>Frontal Pole (13%)               | 20      | 32     | -12      |
| HC > MDD | 1768                            | Subcallosal Cortex (14%)<br>Caudate (32.1%),<br>Accumbens (11.1%) | -2<br>8 | 8<br>6 | -4<br>-2 |

Coordinates are x,y,z values of the locations of the maximum activation likelihood estimation (ALE) values in MNI space. Probabilistic labels reflect the probability that a coordinate belongs to a given region derived from the Harvard-Oxford probabilistic atlas. For clarity, we only report labels whose likelihood exceeds 5%. MDD, major depressive disorder; HC, healthy controls.

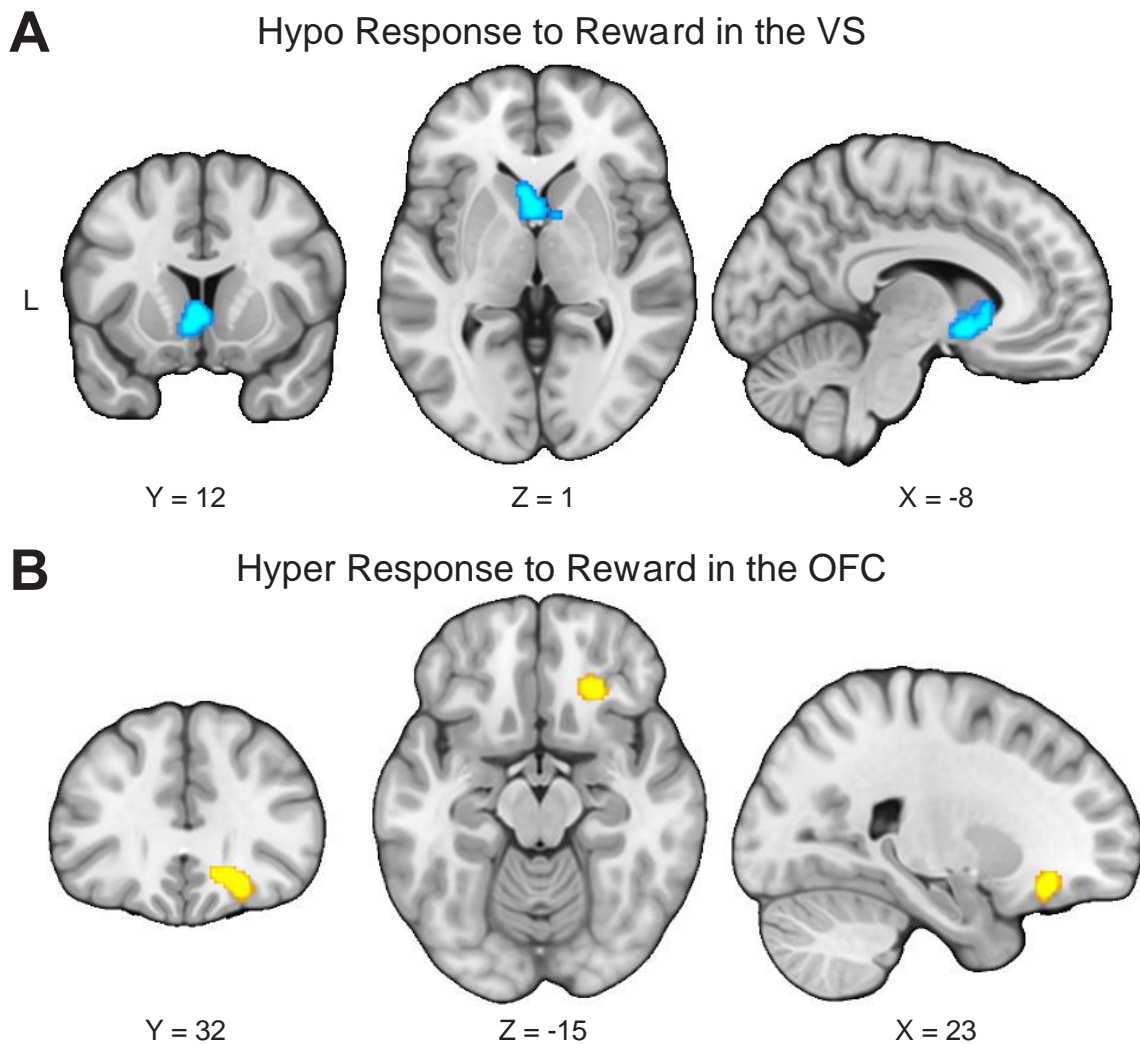

**Figure 2.** Opposing abnormalities in the reward circuit in response to reward in major depressive disorder (MDD). **(A)** To examine regions that consistently showed blunted response to reward, we synthesized 22 studies reporting less activity in response to reward in people with MDD than healthy controls (HCs). Our results indicated that these studies reliably report less activation in the ventral striatum (VS) in MDD. **(B)** To identify regions that consistently showed hyper-responses to reward, we meta-analyzed 18 studies reporting greater activity in response to reward in people with MDD than HCs. Our results indicated that these studies reliably report greater activation in the right orbitofrontal cortex (OFC) in MDD.

## Discussion

A growing number of researchers have used neuroimaging methods to enhance our understanding of the underlying pathophysiology of MDD. Many of these studies have shown that patients with MDD exhibit blunted responses in the VS, but more disparate patterns of responses in other brain areas (Arrondo et al., 2015; Hamilton et al., 2012; Knutson et al., 2008; McCabe et al., 2009; Miller et al., 2015; Palmer et al., 2014; Pizzagalli et al., 2009; Smoski et al., 2009)(Arrondo et al., 2015; Knutson et al., 2008; McCabe et al., 2009; Pizzagalli et al., 2009; Smoski et al., 2009). Therefore, it remains unclear what brain regions, other than the VS, are most consistently implicated in people with MDD, particularly during reward processing (See Table S1 and Figure S1). To address this issue, we performed a coordinate-based meta-analysis of 41 neuroimaging studies containing reward-related responses from a total of 794 patients with MDD and 803 HCs. Our meta-analytic findings confirm that reward responses within the VS are consistently blunted in MDD relative to HCs across studies. In contrast, we find that reward responses within the OFC are consistently elevated in MDD. Contrary to the common notion that MDD is characterized by blunted responses to reward, these findings suggest that MDD may be characterized by both hypo- and hyper-responses to reward at the neural level and highlight the need for a more fine-tuned understanding of the various components of reward processing in MDD.

Although our blunted striatal findings are consistent with previous meta-analytic work documenting reward processing abnormalities in MDD (Groenewold et al., 2013; Keren et al., 2018; Zhang et al., 2013), we emphasize that our work differs in two key ways. First, our results implicate highly specific—yet distinct—abnormalities in the reward circuit, with hypo-responses to reward in the VS and hyper-responses to reward in the OFC. In sharp contrast, previous meta-analyses have generally reported distributed patterns of abnormalities, with little anatomical agreement across studies (see Table S1 and Figure S1).

Second, to minimize bias, our study employed more stringent analysis methods than prior studies in this area, following recommendations by new guidelines (Barch and Pagliaccio, 2017; Muller et al., 2017, 2016). For example, instead of using the FDR approach which has been shown to be inadequate in controlling the false positives among clusters in neuroimaging meta-analyses (Chumbley and Friston, 2009; Eickhoff et al., 2012), we corrected for multiple comparisons using the permutation-based approach. We also excluded ROI- or SVC-based studies and only included whole-brain studies that used an active control condition and independent samples. In addition, we only conducted a meta-analysis when there were at least 17 eligible experiments to ensure adequate statistical power and restrict excessive contribution of any particular studies to cluster-level thresholding (Eickhoff et al., 2016). We speculate that the enhanced rigor and methods of our study contributed to our ability to identify highly circumscribed and distinct abnormalities in the reward circuit.

A prior meta-analysis using similarly rigorous methods revealed no significant convergence of findings among neuroimaging studies comparing MDD and HCs (Muller et al., 2016); nevertheless, we note that the previous meta-analysis differed from the current meta-analysis in at least four key ways. First, whereas the previous meta-analysis focused on emotional or cognitive processing, the current meta-analysis focused solely on reward processing. Second, the previous meta-analysis excluded participants younger than 18 years old; in contrast, the current meta-analysis included participants of all ages, boosting our power and ability to generalize our findings to MDD across ages. Third, the previous meta-analysis included studies up until October 2015, whereas our meta-analysis included studies until August 2018. Finally, the previous meta-analysis excluded MDD participants in remission, whereas the current meta-analysis included them, allowing us to begin to address the question of whether reward processing dysfunction is not simply a state, but a trait of MDD. Our ability to identify significant convergence highlights the significance of reward



processing dysfunction in MDD and might indicate the literature on reward processing in MDD is more homogeneous than that on emotional or cognitive processing in MDD.

In our view, our most important finding is that studies consistently report that people with MDD exhibit hyper-responses to reward in the OFC. Exposure to rewards (e.g., money and pleasant sights) evokes activity in the OFC, which has been associated with the computation and representation of reward value (Berridge and Kringelbach, 2015; Der-Avakian and Markou, 2012; Kringelbach, 2005; Padoa-Schioppa, 2011; Padoa-Schioppa and Conen, 2017; Rolls, 2017). Therefore, given that MDD is traditionally linked to blunted response to reward or reduced capacity to experience pleasure (Whitton et al., 2015), our finding of hyperactivity of the OFC in response to reward in MDD may seem paradoxical. One interpretation would be that MDD is at least partly characterized by hyper-responses to reward, which fits with a set of experimental studies reporting that individuals with severe MDD found dextroamphetamine to be more rewarding than did controls (Naranjo et al., 2001; Tremblay et al., 2005, 2002). Anhedonia, then, may be rooted in decreased connectivity between the prefrontal regions and subcortical regions underlying reward-related behavior, as suggested by previous research (Young et al., 2016).

Alternatively, OFC hyperactivity may reflect enhanced inhibitory control over subcortical regions underlying reward-related behavior, causing anhedonia. Optogenetic and neuroimaging studies have revealed that hyperactivity in prefrontal regions (e.g., medial PFC, vmPFC) innervated by glutamatergic neurons may causally inhibit reward-related behavior via suppressing striatal responses to dopamine neurons in the midbrain (Ferenczi et al., 2016; Robbins, 2016) and increasing connectivity between the medial PFC, lateral OFC, and VS (Ferenczi et al., 2016; Robbins, 2016). In addition, increased negative effective connectivity between the orbital and medial PFC and amygdala in response to reward has been found in MDD, but not bipolar depression or healthy controls (Almeida et al., 2009),

suggesting that the OFC might exert over-control over subcortical regions in MDD, but not bipolar depression or healthy individuals. The differences in the effects of OFC between the groups might be explained by research demonstrating that stimulation of the medial PFC at different frequencies affects dopamine release in the VS differently. Specifically, although stimulation of the medial PFC at low frequencies (10 Hz), which correspond to the firing rate of PFC neurons during performance of cognitive tasks, decreased dopamine release in the VS, high frequency stimulation (60 Hz) increased dopamine release in the VS (Ferenczi et al., 2016; Jackson et al., 2001) and has strong antidepressant effects (Covington et al., 2010; Steinberg et al., 2015). Taken together, OFC hyperactivity may inhibit reward-related behavior and lead to anhedonia via suppressing striatal responses to dopamine neurons in the midbrain (Ferenczi et al., 2016; Robbins, 2016) and increasing connectivity between the PFC and the VS in MDD (Ferenczi et al., 2016; Robbins, 2016).

The role of corticostriatal connectivity during reward processing in MDD remains an open and important question (Admon and Pizzagalli, 2015a; Drysdale et al., 2017; Kaiser et al., 2015). Previous meta-analyses indicate that at least some people with MDD exhibit dysfunction in resting-state corticostriatal connectivity (Drysdale et al., 2017; Kaiser et al., 2015). We believe our meta-analytic results will provide a springboard for future studies that seek to develop a full picture of the pathophysiology of MDD and understand the role of dysregulated corticostriatal connectivity in MDD, particularly in the context of reward processing. These endeavors will require empirical assessments of connectivity within the reward circuit using psychophysiological interaction analysis (Friston et al., 1997; McLaren et al., 2012; Smith et al., 2016a) and dynamic causal modeling (Friston et al., 2003). Such approaches have shown promise for revealing specific patterns of task-dependent corticostriatal interactions in samples containing healthy individuals (Chatham et al., 2014; Smith et al., 2016b; Wimmer et al., 2012; Wimmer and Shohamy, 2012), clinical populations

(Admon and Pizzagalli, 2015a, 2015b; Young et al., 2016), or a mix of both (Hanson et al., 2017). Nevertheless, a caveat of such approaches is that dysregulated corticostriatal connectivity may involve modulatory regions, such as the midbrain (Murty et al., 2014). In addition, although reinforcement learning models, such as actor-critic models and prediction error models have been utilized to understand the pathophysiology of several psychiatric disorders (e.g., schizophrenia and addiction), research on their application on MDD has been scant (Gold et al., 2012; Maia and Frank, 2011). Our results help delineate specific abnormalities within the reward circuit and supply a foundation for refining connectivity-based and computational models of MDD.

Even though our meta-analysis reveals circumscribed patterns of abnormal responses to reward in the VS and OFC, we note that our findings should be interpreted in the context of their limitations. First, heterogeneity across studies may have added noise to our analyses and restricted our capacity for detecting true effects. Specifically, due to the limited number of studies, our analyses collapsed across different reward processes (e.g., anticipation and outcome), reward modalities (e.g., monetary and social), and specific contrasts that would help isolate and differentiate neural responses to salience and valence (Bartra et al., 2013; Clithero and Rangel, 2014; O’Doherty, 2014; Wang et al., 2016; Zald and Treadway, 2017). Our analyses also collapsed across different mood states, psychotropic medication usage, ages, and comorbidities (Drevets, 2007; Hafeman et al., 2012; Phillips et al., 2003). In doing so, important differences in brain activation may be obscured and more specific questions related to brain activation—particularly questions related to neural representations of valence or salience (Bartra et al., 2013; Cooper and Knutson, 2008; Kahnt et al., 2014; Litt et al., 2011)—cannot be addressed in our work. Future studies should examine how these factors may affect reward processing in MDD. Nevertheless, we highlight that the convergence of findings despite the heterogeneity of the included studies is striking and suggests that the

current findings may reflect trait abnormalities of MDD. Second, many included studies have relatively small sample sizes and report coordinates that are not corrected for multiple comparisons, which may lead to biased results (Button et al., 2013; Jia et al., 2018). The validity of a meta-analysis hinges on the validity of the included studies (Akobeng, 2005). Future work should follow the most updated guidelines for best practices in the field to avoid generating biased findings (Nichols et al., 2017). Third, most of the included studies only recruited adults with acute major depression. More studies on other ages (e.g., pre-adolescents, adolescents) and mood states (e.g., remission) are needed. Fourth, we note that the search criteria were designed to focus on studies on reward and might not identify some studies on punishment. Therefore, the analyses and results in relation to punishment are exploratory in nature and should be interpreted with caution. Fifth, the ALE method, by nature, cannot incorporate null results (Muller et al., 2017). As a result, the current findings could be confounded by publication bias. Sixth, it is important to acknowledge that reward processing is complex, and the receipt of reward can be linked to both affective and informative signals (Smith et al., 2016b). Finally, it is important to note that some patients in the included studies were medicated. The normalizing effects of treatment could obscure differences between MDD and HCs, increasing the probability of type II errors (Delaveau et al., 2011; Dichter et al., 2009).

Notwithstanding these caveats, our meta-analysis shows that MDD is consistently associated with opposing abnormalities in the reward circuit in response to reward: hypo-response in the VS and hyper-response in the OFC. Our meta-analytic results therefore argue against the common notion that MDD is only associated with blunted responses to reward. Our findings suggest that MDD may be tied to opposing abnormalities in the OFC and VS, which may suggest MDD stems, in part, from dysregulated connectivity between these regions. We believe our findings will help lay a foundation towards developing a more

refined understanding and treatment of MDD and its comorbid psychiatric disorders, particularly ones that involve abnormal reward processing (Diehl et al., 2018). For example, a more refined understanding of the abnormalities in the reward circuitry in MDD may help distinguish it from other disorders exhibiting reward processing abnormalities, such as bipolar disorder, schizophrenia, and substance use disorder (Batalla et al., 2017; Whitton et al., 2015). Finally, given that previous treatment targets for deep brain stimulation for treatment-resistant depression have yielded mixed results (Bewernick et al., 2010; Holtzheimer et al., 2012, 2017; Jiménez et al., 2005; Lozano et al., 2012; Malone et al., 2009; Naesström et al., 2016; Puigdemont et al., 2012; Schlaepfer et al., 2013; Schlaepfer, 2015), the portion of OFC implicated by our results could be a promising treatment target.

## Acknowledgements

This work was supported, in part, by grants from the National Institutes of Health (R21-MH113917 to DVS and R01-MH077908 to LBA). We note that the manuscript was posted on bioRxiv as a preprint. Study materials are available on Open Science Framework at <https://osf.io/sjb4d>. Images are available on the NeuroVault repository at <https://neurovault.org/collections/3884>.

## **Disclosures**

All authors report no biomedical financial interests or potential conflicts of interest.

## References

- Admon R, Pizzagalli DA. 2015a. Dysfunctional Reward Processing in Depression. *Curr Opin Psychol* **4**:114–118. doi:10.1016/j.copsyc.2014.12.011
- Admon R, Pizzagalli DA. 2015b. Corticostriatal pathways contribute to the natural time course of positive mood. *Nat Commun* **6**:10065. doi:10.1038/ncomms10065
- Akobeng AK. 2005. Understanding systematic reviews and meta-analysis. *Arch Dis Child* **90**:845–848. doi:10.1136/adc.2004.058230
- Alloy LB, Olino T, Freed RD, Nusslock R. 2016. Role of reward sensitivity and processing in major depressive and bipolar spectrum disorders. *Behav Ther* **47**:600–621. doi:10.1016/j.beth.2016.02.014
- Almeida JRC de, Versace A, Mechelli A, Hassel S, Quevedo K, Kupfer DJ, Phillips ML. 2009. Abnormal amygdala-prefrontal effective connectivity to happy faces differentiates bipolar from major depression. *Biol Psychiatry* **66**:451–459. doi:10.1016/j.biopsych.2009.03.024
- Andersson JL, Hutton C, Ashburner J, Turner R, Friston K. 2001. Modeling geometric deformations in EPI time series. *NeuroImage* **13**:903–919. doi:10.1006/nimg.2001.0746
- Arrondo G, Segarra N, Metastasio A, Ziauddeen H, Spencer J, Reinders NR, Dudas RB, Robbins TW, Fletcher PC, Murray GK. 2015. Reduction in ventral striatal activity when anticipating a reward in depression and schizophrenia: a replicated cross-diagnostic finding. *Front Psychol* **6**. doi:10.3389/fpsyg.2015.01280
- Barch DM, Pagliaccio D. 2017. Consistency, Replication, and Meta-analyses of Altered Brain Activity in Unipolar Depression. *JAMA Psychiatry* **74**:56–57. doi:10.1001/jamapsychiatry.2016.2844
- Bartra O, McGuire JT, Kable JW. 2013. The valuation system: A coordinate-based meta-analysis of BOLD fMRI experiments examining neural correlates of subjective value. *NeuroImage* **76**:412–427. doi:10.1016/j.neuroimage.2013.02.063
- Batalla A, Homberg JR, Lipina TV, Sescousse G, Luijten M, Ivanova SA, Schellekens AFA, Loonen AJM. 2017. The role of the habenula in the transition from reward to misery in substance use and mood disorders. *Neurosci Biobehav Rev* **80**:276–285. doi:10.1016/j.neubiorev.2017.03.019
- Berridge KC, Kringelbach ML. 2015. Pleasure Systems in the Brain. *Neuron* **86**:646–664. doi:10.1016/j.neuron.2015.02.018
- Bewernick BH, Hurlmann R, Matusch A, Kayser S, Grubert C, Hadrysiewicz B, Axmacher N, Lemke M, Cooper-Mahkorn D, Cohen MX, Brockmann H, Lenartz D, Sturm V, Schlaepfer TE. 2010. Nucleus Accumbens Deep Brain Stimulation Decreases Ratings of Depression and Anxiety in Treatment-Resistant Depression. *Biol Psychiatry, Stimulating Research on the Treatment of Depression: Electroconvulsive Therapy, Transcranial Magnetic Stimulation, and Deep Brain Stimulation* **67**:110–116. doi:10.1016/j.biopsych.2009.09.013
- Button KS, Ioannidis JPA, Mokrysz C, Nosek BA, Flint J, Robinson ESJ, Munafò MR. 2013. Power failure: why small sample size undermines the reliability of neuroscience. *Nat Rev Neurosci* **14**:365–376. doi:10.1038/nrn3475
- Chase HW, Kumar P, Eickhoff SB, Dombrovski AY. 2015. Reinforcement learning models and their neural correlates: An activation likelihood estimation meta-analysis. *Cogn Affect Behav Neurosci* **15**:435–459. doi:10.3758/s13415-015-0338-7
- Chatham CH, Frank MJ, Badre D. 2014. Corticostriatal Output Gating during Selection from Working Memory. *Neuron* **81**:930–942. doi:10.1016/j.neuron.2014.01.002



- Chumbley JR, Friston KJ. 2009. False discovery rate revisited: FDR and topological inference using Gaussian random fields. *NeuroImage* **44**:62–70. doi:10.1016/j.neuroimage.2008.05.021
- Clithero JA, Rangel A. 2014. Informatic parcellation of the network involved in the computation of subjective value. *Soc Cogn Affect Neurosci* **9**:1289–1302. doi:10.1093/scan/nst106
- Cooper JC, Knutson B. 2008. Valence and salience contribute to nucleus accumbens activation. *NeuroImage* **39**:538–547. doi:10.1016/j.neuroimage.2007.08.009
- Covington HE, Lobo MK, Maze I, Vialou V, Hyman JM, Zaman S, LaPlant Q, Mouzon E, Ghose S, Tamminga CA, Neve RL, Deisseroth K, Nestler EJ. 2010. Antidepressant effect of optogenetic stimulation of the medial prefrontal cortex. *J Neurosci Off J Soc Neurosci* **30**:16082–16090. doi:10.1523/JNEUROSCI.1731-10.2010
- Delaveau P, Jabourian M, Lemogne C, Guionnet S, Bergouignan L, Fossati P. 2011. Brain effects of antidepressants in major depression: A meta-analysis of emotional processing studies. *J Affect Disord* **130**:66–74. doi:10.1016/j.jad.2010.09.032
- Delgado MR, Beer JS, Fellows LK, Huettel SA, Platt ML, Quirk GJ, Schiller D. 2016. Viewpoints: Dialogues on the functional role of the ventromedial prefrontal cortex. *Nat Neurosci*. doi:10.1038/nn.4438
- Delvecchio G, Sugranyes G, Frangou S. 2013. Evidence of diagnostic specificity in the neural correlates of facial affect processing in bipolar disorder and schizophrenia: a meta-analysis of functional imaging studies. *Psychol Med* **43**:553–569. doi:10.1017/S0033291712001432
- Demenescu LR, Renken R, Korteckaas R, van Tol M-J, Marsman JBC, van Buchem MA, van der Wee NJA, Veltman DJ, den Boer JA, Aleman A. 2011. Neural correlates of perception of emotional facial expressions in out-patients with mild-to-moderate depression and anxiety. A multicenter fMRI study. *Psychol Med* **41**:2253–2264. doi:10.1017/S0033291711000596
- Der-Avakian A, Markou A. 2012. The neurobiology of anhedonia and other reward-related deficits. *Trends Neurosci* **35**:68–77. doi:10.1016/j.tins.2011.11.005
- Desikan RS, Ségonne F, Fischl B, Quinn BT, Dickerson BC, Blacker D, Buckner RL, Dale AM, Maguire RP, Hyman BT, Albert MS, Killiany RJ. 2006. An automated labeling system for subdividing the human cerebral cortex on MRI scans into gyral based regions of interest. *NeuroImage* **31**:968–980. doi:10.1016/j.neuroimage.2006.01.021
- Dichter GS, Felder JN, Petty C, Bizzell J, Ernst M, Smoski MJ. 2009. The Effects of Psychotherapy on Neural Responses to Rewards in Major Depression. *Biol Psychiatry* **66**:886–897. doi:10.1016/j.biopsych.2009.06.021
- Dichter GS, Kozink RV, McClernon FJ, Smoski MJ. 2012. Remitted major depression is characterized by reward network hyperactivation during reward anticipation and hypoactivation during reward outcomes. *J Affect Disord* **136**:1126–1134. doi:10.1016/j.jad.2011.09.048
- Diehl MM, Lempert K, Parr AC, Ballard I, Steele VR, Smith DV. 2018. Toward an Integrative Perspective on the Neural Mechanisms Underlying Persistent Maladaptive Behaviors. *PsyArXiv*. doi:10.17605/OSF.IO/YVDS9
- Dougherty DD, Rezai AR, Carpenter LL, Howland RH, Bhati MT, O’Reardon JP, Eskandar EN, Baltuch GH, Machado AD, Kondziolka D, Cusin C, Evans KC, Price LH, Jacobs K, Pandya M, Denko T, Tyrka AR, Brelje T, Deckersbach T, Kubu C, Malone DA. 2015. A Randomized Sham-Controlled Trial of Deep Brain Stimulation of the Ventral Capsule/Ventral Striatum for Chronic Treatment-Resistant Depression. *Biol Psychiatry, Depression* **78**:240–248. doi:10.1016/j.biopsych.2014.11.023

- Drevets WC. 2007. Orbitofrontal Cortex Function and Structure in Depression. *Ann N Y Acad Sci* **1121**:499–527. doi:10.1196/annals.1401.029
- Drysdale AT, Grosenick L, Downar J, Dunlop K, Mansouri F, Meng Y, Fetcho RN, Zebley B, Oathes DJ, Etkin A, Schatzberg AF, Sudheimer K, Keller J, Mayberg HS, Gunning FM, Alexopoulos GS, Fox MD, Pascual-Leone A, Voss HU, Casey BJ, Dubin MJ, Liston C. 2017. Resting-state connectivity biomarkers define neurophysiological subtypes of depression. *Nat Med* **23**:28–38. doi:10.1038/nm.4246
- Eickhoff SB, Bzdok D, Laird AR, Kurth F, Fox PT. 2012. Activation Likelihood Estimation meta-analysis revisited. *Neuroimage* **59**:2349–2361. doi:10.1016/j.neuroimage.2011.09.017
- Eickhoff SB, Laird AR, Fox PM, Lancaster JL, Fox PT. 2017. Implementation Errors in the GingerALE Software: Description and Recommendations. *Hum Brain Mapp* **38**:7–11. doi:10.1002/hbm.23342
- Eickhoff SB, Laird AR, Grefkes C, Wang LE, Zilles K, Fox PT. 2009. Coordinate-based activation likelihood estimation meta-analysis of neuroimaging data: a random-effects approach based on empirical estimates of spatial uncertainty. *Hum Brain Mapp* **30**:2907–2926. doi:10.1002/hbm.20718
- Eickhoff SB, Nichols TE, Laird AR, Hoffstaedter F, Amunts K, Fox PT, Bzdok D, Eickhoff CR. 2016. Behavior, sensitivity, and power of activation likelihood estimation characterized by massive empirical simulation. *NeuroImage* **137**:70–85. doi:10.1016/j.neuroimage.2016.04.072
- Ferenczi EA, Zalocusky KA, Liston C, Grosenick L, Warden MR, Amatya D, Katovich K, Mehta H, Patenaude B, Ramakrishnan C, Kalanithi P, Etkin A, Knutson B, Glover GH, Deisseroth K. 2016. Prefrontal cortical regulation of brainwide circuit dynamics and reward-related behavior. *Science* **351**:aac9698. doi:10.1126/science.aac9698
- Forbes EE, May JC, Siegle GJ, Ladouceur CD, Ryan ND, Carter CS, Birmaher B, Axelson DA, Dahl RE. 2006. Reward-Related Decision-Making in Pediatric Major Depressive Disorder: An fMRI Study. *J Child Psychol Psychiatry* **47**:1031–1040. doi:10.1111/j.1469-7610.2006.01673.x
- Fox PT, Parsons LM, Lancaster JL. 1998. Beyond the single study: function/location metaanalysis in cognitive neuroimaging. *Curr Opin Neurobiol* **8**:178–187. doi:10.1016/S0959-4388(98)80138-4
- Friedrich MJ. 2017. Depression Is the Leading Cause of Disability Around the World. *JAMA* **317**:1517. doi:10.1001/jama.2017.3826
- Friston KJ, Buechel C, Fink GR, Morris J, Rolls E, Dolan RJ. 1997. Psychophysiological and modulatory interactions in neuroimaging. *NeuroImage* **6**:218–229. doi:10.1006/nimg.1997.0291
- Friston KJ, Harrison L, Penny W. 2003. Dynamic causal modelling. *NeuroImage* **19**:1273–1302. doi:10.1016/S1053-8119(03)00202-7
- Gold JM, Waltz JA, Matveeva TM, Kasanova Z, Strauss GP, Herbener ES, Collins AGE, Frank MJ. 2012. Negative Symptoms and the Failure to Represent the Expected Reward Value of Actions: Behavioral and Computational Modeling Evidence. *Arch Gen Psychiatry* **69**:129–138. doi:10.1001/archgenpsychiatry.2011.1269
- Groenewold NA, Opmeer EM, de Jonge P, Aleman A, Costafreda SG. 2013. Emotional valence modulates brain functional abnormalities in depression: Evidence from a meta-analysis of fMRI studies. *Neurosci Biobehav Rev* **37**:152–163. doi:10.1016/j.neubiorev.2012.11.015
- Haber SN. 2016. Corticostriatal circuitry. *Dialogues Clin Neurosci* **18**:7–21.
- Haber SN, Knutson B. 2010. The reward circuit: Linking primate anatomy and human imaging. *Neuropsychopharmacology* **35**:4–26. doi:10.1038/npp.2009.129

- Hafeman DM, Chang KD, Garrett AS, Sanders EM, Phillips ML. 2012. Effects of medication on neuroimaging findings in bipolar disorder: an updated review. *Bipolar Disord* **14**:375–410. doi:10.1111/j.1399-5618.2012.01023.x
- Hamilton JP, Etkin A, Furman DJ, Lemus MG, Johnson RF, Gotlib IH. 2012. Functional neuroimaging of major depressive disorder: a meta-analysis and new integration of base line activation and neural response data. *Am J Psychiatry* **169**:693–703. doi:10.1176/appi.ajp.2012.11071105
- Hanson JL, Hariri AR, Williamson DE. 2015. Blunted ventral striatum development in adolescence reflects emotional neglect and predicts depressive symptoms. *Biol Psychiatry* **78**:598–605. doi:10.1016/j.biopsych.2015.05.010
- Hanson JL, Knodt AR, Brigidi BD, Hariri AR. 2017. Heightened connectivity between the ventral striatum and medial prefrontal cortex as a biomarker for stress-related psychopathology: understanding interactive effects of early and more recent stress. *Psychol Med* 1–9. doi:10.1017/S0033291717003348
- Hayden BY, Parikh PC, Deaner RO, Platt ML. 2007. Economic principles motivating social attention in humans. *Proc R Soc B Biol Sci* **274**:1751–1756. doi:10.1098/rspb.2007.0368
- Heshmati M, Russo SJ. 2015. Anhedonia and the brain reward circuitry in depression. *Curr Behav Neurosci Rep* **2**:146–153. doi:10.1007/s40473-015-0044-3
- Holtzheimer PE, Husain MM, Lisanby SH, Taylor SF, Whitworth LA, McClintock S, Slavin KV, Berman J, McKhann GM, Patil PG, Rittberg BR, Abosch A, Pandurangi AK, Holloway KL, Lam RW, Honey CR, Neimat JS, Henderson JM, DeBattista C, Rothschild AJ, Pilitsis JG, Espinoza RT, Petrides G, Mogilner AY, Matthews K, Peichel D, Gross RE, Hamani C, Lozano AM, Mayberg HS. 2017. Subcallosal cingulate deep brain stimulation for treatment-resistant depression: a multisite, randomised, sham-controlled trial. *Lancet Psychiatry*. doi:10.1016/S2215-0366(17)30371-1
- Holtzheimer PE, Kelley ME, Gross RE, Filkowski MM, Garlow SJ, Barrocas A, Wint D, Craighead MC, Kozarsky J, Chismar R, Moreines JL, Mewes K, Posse PR, Gutman DA, Mayberg HS. 2012. Subcallosal cingulate deep brain stimulation for treatment-resistant unipolar and bipolar depression. *Arch Gen Psychiatry* **69**:150–158. doi:10.1001/archgenpsychiatry.2011.1456
- Jackson ME, Frost AS, Moghaddam B. 2001. Stimulation of prefrontal cortex at physiologically relevant frequencies inhibits dopamine release in the nucleus accumbens. *J Neurochem* **78**:920–923.
- Jia X-Z, Zhao N, Barton B, Burciu R, Carriere N, Cerasa A, Chen B-Y, Chen J, Coombes S, Defebvre L, Delmaire C, Dujardin K, Esposito F, Fan G-G, Federica DN, Feng Y-X, Fling BW, Garg S, Gilat M, Gorges M, Ho S-L, Horak FB, Hu X, Hu X-F, Huang B, Huang P-Y, Jia Z-J, Jones C, Kassubek J, Krajcovicova L, Kurani A, Li J, Li Q, Liu A-P, Liu B, Liu H, Liu W-G, Lopes R, Lou Y-T, Luo W, Madhyastha T, Mao N-N, McAlonan G, McKeown MJ, Pang SY, Quattrone A, Rektorova I, Sarica A, Shang H-F, Shine J, Shukla P, Slavicek T, Song X-P, Tedeschi G, Tessitore A, Vaillancourt D, Wang Jian, Wang Jue, Wang ZJ, Wei L-Q, Wu X, Xu X-J, Yan L, Yang J, Yang W-Q, Yao N-L, Zhang D-L, Zhang J-Q, Zhang M-M, Zhang Y-L, Zhou C-H, Yan C-G, Zuo X-N, Hallett M, Wu T, Zang Y-F. 2018. Small effect size leads to reproducibility failure in resting-state fMRI studies. *bioRxiv* 285171. doi:10.1101/285171
- Jiménez F, Velasco F, Salin-Pascual R, Hernández JA, Velasco M, Criales JL, Nicolini H. 2005. A Patient with a Resistant Major Depression Disorder Treated with Deep Brain Stimulation in the Inferior Thalamic Peduncle. *Neurosurgery* **57**:585–593. doi:10.1227/01.NEU.0000170434.44335.19

- Kahnt T, Park SQ, Haynes J-D, Tobler PN. 2014. Disentangling neural representations of value and salience in the human brain. *Proc Natl Acad Sci U S A* **111**:5000–5005. doi:10.1073/pnas.1320189111
- Kaiser RH, Andrews-Hanna JR, Wager TD, Pizzagalli DA. 2015. Large-Scale Network Dysfunction in Major Depressive Disorder: A Meta-analysis of Resting-State Functional Connectivity. *JAMA Psychiatry* **72**:603–611. doi:10.1001/jamapsychiatry.2015.0071
- Keedwell PA, Andrew C, Williams SCR, Brammer MJ, Phillips ML. 2005. A double dissociation of ventromedial prefrontal cortical responses to sad and happy stimuli in depressed and healthy individuals. *Biol Psychiatry* **58**:495–503. doi:10.1016/j.biopsych.2005.04.035
- Keren H, O’Callaghan G, Vidal-Ribas P, Buzzell GA, Brotman MA, Leibenluft E, Pan PM, Meffert L, Kaiser A, Wolke S, Pine DS, Stringaris A. 2018. Reward Processing in Depression: A Conceptual and Meta-Analytic Review Across fMRI and EEG Studies. *Am J Psychiatry* appi.ajp.2018.17101124. doi:10.1176/appi.ajp.2018.17101124
- Knutson B, Bhanji JP, Cooney RE, Atlas LY, Gotlib IH. 2008. Neural responses to monetary incentives in major depression. *Biol Psychiatry* **63**:686–692. doi:10.1016/j.biopsych.2007.07.023
- Krach S, Paulus FM, Bodden M, Kircher T. 2010. The Rewarding Nature of Social Interactions. *Front Behav Neurosci* **4**. doi:10.3389/fnbeh.2010.00022
- Kringelbach ML. 2005. The human orbitofrontal cortex: linking reward to hedonic experience. *Nat Rev Neurosci* **6**:691–702. doi:10.1038/nrn1747
- Kumari V, Mitterschiffthaler MT, Teasdale JD, Malhi GS, Brown RG, Giampietro V, Brammer MJ, Poon L, Simmons A, Williams SCR, Checkley SA, Sharma T. 2003. Neural abnormalities during cognitive generation of affect in treatment-resistant depression. *Biol Psychiatry* **54**:777–791.
- Laird AR, Fox PM, Price CJ, Glahn DC, Uecker AM, Lancaster JL, Turkeltaub PE, Kochunov P, Fox PT. 2005. ALE meta-analysis: controlling the false discovery rate and performing statistical contrasts. *Hum Brain Mapp* **25**:155–164. doi:10.1002/hbm.20136
- Lancaster JL, Tordesillas-Gutiérrez D, Martínez M, Salinas F, Evans A, Zilles K, Mazziotta JC, Fox PT. 2007. Bias between MNI and Talairach coordinates analyzed using the ICBM-152 brain template. *Hum Brain Mapp* **28**:1194–1205. doi:10.1002/hbm.20345
- Levy DJ, Glimcher PW. 2012. The root of all value: a neural common currency for choice. *Curr Opin Neurobiol* **22**:1027–1038. doi:10.1016/j.conb.2012.06.001
- Litt A, Plassmann H, Shiv B, Rangel A. 2011. Dissociating Valuation and Saliency Signals during Decision-Making. *Cereb Cortex* **21**:95–102. doi:10.1093/cercor/bhq065
- Lozano AM, Giacobbe P, Hamani C, Rizvi SJ, Kennedy SH, Kolivakis TT, Debonnel G, Sadikot AF, Lam RW, Howard AK, Ilcewicz-Klimek M, Honey CR, Mayberg HS. 2012. A multicenter pilot study of subcallosal cingulate area deep brain stimulation for treatment-resistant depression. *J Neurosurg* **116**:315–322. doi:10.3171/2011.10.JNS102122
- Luking KR, Pagliaccio D, Luby JL, Barch DM. 2016. Reward Processing and Risk for Depression Across Development. *Trends Cogn Sci* **20**:456–468. doi:10.1016/j.tics.2016.04.002
- Maia TV, Frank MJ. 2011. From reinforcement learning models to psychiatric and neurological disorders. *Nat Neurosci* **14**:154–162. doi:10.1038/nn.2723
- Malone DA, Dougherty DD, Rezai AR, Carpenter LL, Friehs GM, Eskandar EN, Rauch SL, Rasmussen SA, Machado AG, Kubu CS, Tyrka AR, Price LH, Stypulkowski PH, Giftakis JE, Rise MT, Malloy PF, Salloway SP, Greenberg BD. 2009. Deep Brain

- Stimulation of the Ventral Capsule/Ventral Striatum for Treatment-Resistant Depression. *Biol Psychiatry* **65**:267–275. doi:10.1016/j.biopsych.2008.08.029
- Mazziotta JC, Toga AW, Evans A, Fox P, Lancaster J. 1995. A Probabilistic Atlas of the Human Brain: Theory and Rationale for Its Development: The International Consortium for Brain Mapping (ICBM). *NeuroImage* **2**:89–101. doi:10.1006/nimg.1995.1012
- McCabe C, Cowen PJ, Harmer CJ. 2009. Neural representation of reward in recovered depressed patients. *Psychopharmacology (Berl)* **205**:667–677. doi:10.1007/s00213-009-1573-9
- McLaren DG, Ries ML, Xu G, Johnson SC. 2012. A generalized form of context-dependent psychophysiological interactions (gPPI): a comparison to standard approaches. *NeuroImage* **61**:1277–1286. doi:10.1016/j.neuroimage.2012.03.068
- Miller CH, Hamilton JP, Sacchet MD, Gotlib IH. 2015. Meta-analysis of Functional Neuroimaging of Major Depressive Disorder in Youth. *JAMA Psychiatry* **72**:1045–1053. doi:10.1001/jamapsychiatry.2015.1376
- Mitterschiffthaler MT, Kumari V, Malhi GS, Brown RG, Giampietro VP, Brammer MJ, Suckling J, Poon L, Simmons A, Andrew C, Sharma T. 2003. Neural response to pleasant stimuli in anhedonia: an fMRI study. *Neuroreport* **14**:177–182. doi:10.1097/01.wnr.0000053758.76853.cc
- Moher D, Liberati A, Tetzlaff J, Altman DG, PRISMA Group. 2009. Preferred reporting items for systematic reviews and meta-analyses: the PRISMA statement. *BMJ* **339**:b2535.
- Morgan JK, Olinio TM, McMakin DL, Ryan ND, Forbes EE. 2013. Neural response to reward as a predictor of increases in depressive symptoms in adolescence. *Neurobiol Dis* **52**:66–74. doi:10.1016/j.nbd.2012.03.039
- Muller VI, Cieslik EC, Laird AR, Fox PT, Radua J, Mataix-Cols D, Tench CR, Yarkoni T, Nichols TE, Turkeltaub PE, Wager TD, Eickhoff SB. 2017. Ten simple rules for neuroimaging meta-analysis. *Neurosci Biobehav Rev*. doi:10.1016/j.neubiorev.2017.11.012
- Muller VI, Cieslik EC, Serbanescu I, Laird AR, Fox PT, Eickhoff SB. 2016. Altered Brain Activity in Unipolar Depression Revisited: Meta-analyses of Neuroimaging Studies. *JAMA Psychiatry*. doi:10.1001/jamapsychiatry.2016.2783
- Murty VP, Shermohammed M, Smith DV, Carter RM, Huettel SA, Adcock RA. 2014. Resting state networks distinguish human ventral tegmental area from substantia nigra. *NeuroImage* **100**:580–589. doi:10.1016/j.neuroimage.2014.06.047
- Naesström M, Blomstedt P, Bodlund O. 2016. A systematic review of psychiatric indications for deep brain stimulation, with focus on major depressive and obsessive-compulsive disorder. *Nord J Psychiatry* **70**:483–491. doi:10.3109/08039488.2016.1162846
- Naranjo CA, Tremblay LK, Busto UE. 2001. The role of the brain reward system in depression. *Prog Neuropsychopharmacol Biol Psychiatry* **25**:781–823. doi:10.1016/S0278-5846(01)00156-7
- Nichols TE, Das S, Eickhoff SB, Evans AC, Glatard T, Hanke M, Kriegeskorte N, Milham MP, Poldrack RA, Poline J-B, Proal E, Thirion B, Van Essen DC, White T, Yeo BTT. 2017. Best practices in data analysis and sharing in neuroimaging using MRI. *Nat Neurosci* **20**:299–303. doi:10.1038/nn.4500
- Nusslock R, Alloy LB. 2017. Reward Processing and Mood-Related Symptoms: An RDoC and Translational Neuroscience Perspective. *J Affect Disord* **216**:3–16. doi:10.1016/j.jad.2017.02.001
- O’Doherty JP. 2014. The problem with value. *Neurosci Biobehav Rev* **43**:259–268. doi:10.1016/j.neubiorev.2014.03.027

- Ojemann JG, Akbudak E, Snyder AZ, McKinstry RC, Raichle ME, Conturo TE. 1997. Anatomic localization and quantitative analysis of gradient refocused echo-planar fMRI susceptibility artifacts. *NeuroImage* **6**:156–167. doi:10.1006/nimg.1997.0289
- Olino TM. 2016. Future Research Directions in the Positive Valence Systems: Measurement, Development, and Implications for Youth Unipolar Depression. *J Clin Child Adolesc Psychol Off J Soc Clin Child Adolesc Psychol Am Psychol Assoc Div 53* **45**:681–705. doi:10.1080/15374416.2015.1118694
- Olino TM, McMakin DL, Dahl RE, Ryan ND, Silk JS, Birmaher B, Axelson DA, Forbes EE. 2011. “I won, but I’m not getting my hopes up”: Depression moderates the relationship of outcomes and reward anticipation. *Psychiatry Res Neuroimaging* **194**:393–395. doi:10.1016/j.psychres.2011.04.009
- Olino TM, McMakin DL, Morgan JK, Silk JS, Birmaher B, Axelson DA, Williamson DE, Dahl RE, Ryan ND, Forbes EE. 2014. Reduced reward anticipation in youth at high-risk for unipolar depression: A preliminary study. *Dev Cogn Neurosci*, Developmental Social and Affective Neuroscience **8**:55–64. doi:10.1016/j.dcn.2013.11.005
- Padoa-Schioppa C. 2011. Neurobiology of economic choice: A good-based model. *Annu Rev Neurosci* **34**:333–359. doi:10.1146/annurev-neuro-061010-113648
- Padoa-Schioppa C, Conen KE. 2017. Orbitofrontal Cortex: A Neural Circuit for Economic Decisions. *Neuron* **96**:736–754. doi:10.1016/j.neuron.2017.09.031
- Palmer SM, Crewther SG, Carey LM, START Project Team. 2014. A meta-analysis of changes in brain activity in clinical depression. *Front Hum Neurosci* **8**:1045. doi:10.3389/fnhum.2014.01045
- Peters J, Büchel C. 2010. Neural representations of subjective reward value. *Behav Brain Res* **213**:135–141. doi:10.1016/j.bbr.2010.04.031
- Phelps EA, Lempert KM, Sokol-Hessner P. 2014. Emotion and decision making: multiple modulatory neural circuits. *Annu Rev Neurosci* **37**:263–287. doi:10.1146/annurev-neuro-071013-014119
- Phillips ML, Drevets WC, Rauch SL, Lane R. 2003. Neurobiology of emotion perception II: Implications for major psychiatric disorders. *Biol Psychiatry* **54**:515–528.
- Pizzagalli DA. 2014. Depression, stress, and anhedonia: toward a synthesis and integrated model. *Annu Rev Clin Psychol* **10**:393–423. doi:10.1146/annurev-clinpsy-050212-185606
- Pizzagalli DA, Holmes AJ, Dillon DG, Goetz EL, Birk JL, Bogdan R, Dougherty DD, Iosifescu DV, Rauch SL, Fava M. 2009. Reduced Caudate and Nucleus Accumbens Response to Rewards in Unmedicated Subjects with Major Depressive Disorder. *Am J Psychiatry* **166**:702–710. doi:10.1176/appi.ajp.2008.08081201
- Poldrack RA, Baker CI, Durnez J, Gorgolewski KJ, Matthews PM, Munafò MR, Nichols TE, Poline J-B, Vul E, Yarkoni T. 2017. Scanning the horizon: towards transparent and reproducible neuroimaging research. *Nat Rev Neurosci* **18**:115–126. doi:10.1038/nrn.2016.167
- Puigdemont D, Pérez-Egea R, Portella MJ, Molet J, de Diego-Adeliño J, Gironell A, Radua J, Gómez-Anson B, Rodríguez R, Serra M, de Quintana C, Artigas F, Álvarez E, Pérez V. 2012. Deep brain stimulation of the subcallosal cingulate gyrus: further evidence in treatment-resistant major depression. *Int J Neuropsychopharmacol* **15**:121–133. doi:10.1017/S1461145711001088
- Rangel A, Camerer C, Montague PR. 2008. A framework for studying the neurobiology of value-based decision making. *Nat Rev Neurosci* **9**:545–556. doi:10.1038/nrn2357
- Rizvi SJ, Salomons TV, Konarski JZ, Downar J, Giacobbe P, McIntyre RS, Kennedy SH. 2013. Neural response to emotional stimuli associated with successful antidepressant

- treatment and behavioral activation. *J Affect Disord* **151**:573–581.  
doi:10.1016/j.jad.2013.06.050
- Robbins TW. 2016. Illuminating anhedonia. *Science* **351**:24–25.  
doi:10.1126/science.aad9698
- Rolls ET. 2017. The orbitofrontal cortex and emotion in health and disease, including depression. *Neuropsychologia*. doi:10.1016/j.neuropsychologia.2017.09.021
- Saez RA, Saez A, Paton JJ, Lau B, Salzman CD. 2017. Distinct Roles for the Amygdala and Orbitofrontal Cortex in Representing the Relative Amount of Expected Reward. *Neuron* **95**:70–77.e3. doi:10.1016/j.neuron.2017.06.012
- Schlaepfer TE. 2015. Deep Brain Stimulation for Major Depression—Steps on a Long and Winding Road. *Biol Psychiatry, Depression* **78**:218–219.  
doi:10.1016/j.biopsych.2015.06.020
- Schlaepfer TE, Bewernick BH, Kayser S, Mädler B, Coenen VA. 2013. Rapid effects of deep brain stimulation for treatment-resistant major depression. *Biol Psychiatry* **73**:1204–1212. doi:10.1016/j.biopsych.2013.01.034
- Smith DV, Delgado MR. 2017. Meta-analysis of psychophysiological interactions: Revisiting cluster-level thresholding and sample sizes. *Hum Brain Mapp* **38**:588–591.  
doi:10.1002/hbm.23354
- Smith DV, Delgado MR. 2015. Reward Processing In: Toga AW, editor. *Brain Mapping: An Encyclopedic Reference*. Waltham, MA: Academic Press. pp. 361–366.
- Smith DV, Gseir M, Speer ME, Delgado MR. 2016a. Toward a cumulative science of functional integration: A meta-analysis of psychophysiological interactions. *Hum Brain Mapp* **37**:2904–2917. doi:10.1002/hbm.23216
- Smith DV, Huettel SA. 2010. Decision Neuroscience: Neuroeconomics. *Wiley Interdiscip Rev Cogn Sci* **1**:854–871. doi:10.1002/wcs.73
- Smith DV, Rigney AE, Delgado MR. 2016b. Distinct Reward Properties are Encoded via Corticostriatal Interactions. *Sci Rep* **6**:20093. doi:10.1038/srep20093
- Smoski MJ, Felder J, Bizzell J, Green SR, Ernst M, Lynch TR, Dichter GS. 2009. FMRI of Alterations in Reward Selection, Anticipation, and Feedback in Major Depressive Disorder. *J Affect Disord* **118**:69–78. doi:10.1016/j.jad.2009.01.034
- Stalnaker TA, Cooch NK, Schoenbaum G. 2015. What the orbitofrontal cortex does not do. *Nat Neurosci* **18**:620–627. doi:10.1038/nn.3982
- Steinberg EE, Christoffel DJ, Deisseroth K, Malenka RC. 2015. Illuminating circuitry relevant to psychiatric disorders with optogenetics. *Curr Opin Neurobiol* **0**:9–16.  
doi:10.1016/j.conb.2014.08.004
- Stringaris A, Vidal-Ribas Belil P, Artiges E, Lemaitre H, Gollier-Briant F, Wolke S, Vulser H, Miranda R, Penttilä J, Struve M, Fadai T, Kappel V, Grimmer Y, Goodman R, Poustka L, Conrod P, Cattrell A, Banaschewski T, Bokde ALW, Bromberg U, Büchel C, Flor H, Frouin V, Gallinat J, Garavan H, Gowland P, Heinz A, Ittermann B, Nees F, Papadopoulos D, Paus T, Smolka MN, Walter H, Whelan R, Martinot J-L, Schumann G, Paillère-Martinot M-L, IMAGEN Consortium. 2015. The Brain's Response to Reward Anticipation and Depression in Adolescence: Dimensionality, Specificity, and Longitudinal Predictions in a Community-Based Sample. *Am J Psychiatry* **172**:1215–1223. doi:10.1176/appi.ajp.2015.14101298
- Treadway MT, Zald DH. 2011. Reconsidering Anhedonia in Depression: Lessons from Translational Neuroscience. *Neurosci Biobehav Rev* **35**:537–555.  
doi:10.1016/j.neubiorev.2010.06.006
- Tremblay LK, Naranjo CA, Cardenas L, Herrmann N, Busto UE. 2002. Probing Brain Reward System Function in Major Depressive Disorder: Altered Response to

- Dextroamphetamine. *Arch Gen Psychiatry* **59**:409–416.  
doi:10.1001/archpsyc.59.5.409
- Tremblay LK, Naranjo CA, Graham SJ, Herrmann N, Mayberg HS, Hevenor S, Busto UE. 2005. Functional Neuroanatomical Substrates of Altered Reward Processing in Major Depressive Disorder Revealed by a Dopaminergic Probe. *Arch Gen Psychiatry* **62**:1228–1236. doi:10.1001/archpsyc.62.11.1228
- Tsukiura T, Cabeza R. 2008. Orbitofrontal and hippocampal contributions to memory for face-name associations: The rewarding power of a smile. *Neuropsychologia* **46**:2310–2319. doi:10.1016/j.neuropsychologia.2008.03.013
- Turkeltaub PE, Eickhoff SB, Laird AR, Fox M, Wiener M, Fox P. 2012. Minimizing within-experiment and within-group effects in Activation Likelihood Estimation meta-analyses. *Hum Brain Mapp* **33**:1–13. doi:10.1002/hbm.21186
- Voorn P, Vanderschuren LJMJ, Groenewegen HJ, Robbins TW, Pennartz CMA. 2004. Putting a spin on the dorsal-ventral divide of the striatum. *Trends Neurosci* **27**:468–474. doi:10.1016/j.tins.2004.06.006
- Wang KS, Smith DV, Delgado MR. 2016. Using fMRI to study reward processing in humans: past, present, and future. *J Neurophysiol* **115**:1664–1678.  
doi:10.1152/jn.00333.2015
- Whitton AE, Treadway MT, Pizzagalli DA. 2015. Reward processing dysfunction in major depression, bipolar disorder and schizophrenia. *Curr Opin Psychiatry* **28**:7–12.  
doi:10.1097/YCO.000000000000122
- Wimmer GE, Daw ND, Shohamy D. 2012. Generalization of value in reinforcement learning by humans. *Eur J Neurosci* **35**:1092–1104. doi:10.1111/j.1460-9568.2012.08017.x
- Wimmer GE, Shohamy D. 2012. Preference by Association: How Memory Mechanisms in the Hippocampus Bias Decisions. *Science* **338**:270–273.  
doi:10.1126/science.1223252
- World Health Organization. 2017. Depression and other common mental disorders: global health estimates.
- Young KD, Bodurka J, Drevets WC. 2016. Differential neural correlates of autobiographical memory recall in bipolar and unipolar depression. *Bipolar Disord* **18**:571–582.  
doi:10.1111/bdi.12441
- Zald DH, Treadway MT. 2017. Reward Processing, Neuroeconomics, and Psychopathology. *Annu Rev Clin Psychol* **13**:471–495. doi:10.1146/annurev-clinpsy-032816-044957
- Zhang WN, Chang SH, Guo LY, Zhang KL, Wang J. 2013. The neural correlates of reward-related processing in major depressive disorder: A meta-analysis of functional magnetic resonance imaging studies. *J Affect Disord* **151**:531–539.  
doi:10.1016/j.jad.2013.06.039



# **Meta-analysis of Reward Processing in Major Depressive Disorder Reveals Distinct Abnormalities within the Reward Circuit**

## *Supplemental Information*

### **Supplementary Results and Discussion**

#### **Aberrant Reward Responses in Major Depressive Disorder (MDD)— Excluding Neutral Stimuli > Punishment Contrast**

As a significant result for the contrast of neutral stimuli > punishment could be due to positive reward salience (i.e., reward > neutral stimuli > punishment) or negative reward salience (i.e., neutral stimuli > reward/punishment), we conducted sensitivity analyses to examine whether excluding studies that used neutral stimuli > punishment as a reward contrast would affect our main results related to reward responses in MDD. After excluding the 2 experiments of neutral stimuli > punishment (1, 2), the results remained the same: We found significant convergence among experiments reporting blunted responses for reward in MDD relative to HCs in the VS, as well as significant convergence among experiments reporting elevated responses for reward in MDD relative to HCs in the OFC (See Table S4).

#### **Hyper Punishment Responses in Major Depressive Disorder (MDD)**

We also conducted exploratory analyses to examine which brain regions consistently show aberrant responses to punishment in MDD relative to HCs. First, we meta-analyzed 24 studies reporting greater activity in response to punishment in people with MDD than HCs (i.e. MDD > HC for punishment > reward/neutral stimuli or neutral stimuli > reward). Our results indicated that these studies reliably reported greater activation in the left sublentiform extended amygdala in MDD (Table S5; Figure S2). Second, we synthesized 17 studies reporting less activity in response to punishment in people with MDD than HCs (i.e. HC > MDD for punishment >

reward/neutral stimuli or neutral stimuli > reward). Our results indicated that these studies did not report consistent activation patterns. Together, these results suggest that relative to HCs, people with MDD exhibited hyper-responses in the left sublentiform extended amygdala during processing of punishment-relevant stimuli.

Our finding fits with others in suggesting that amygdala hyperactivation is linked to the processing of affectively salient, especially punishing, stimuli in MDD, and may underlie negativity bias in depression (3, 4). It is also in agreement with a meta-analysis indicating increased activation in the amygdala in response to negative stimuli in MDD relative to HCs (5) and a long series of studies indicating that the amygdala may be a key brain region implicated in the pathophysiology of depression (6–8). Interestingly, longitudinal studies have reported that amygdala reactivity, potentially in combination with life stress, prospectively predicts internalizing (e.g., depressive and anxiety) symptoms (9, 10), highlighting the importance of amygdala reactivity in the course of depression.

**Table S1.** Comparison of Findings on Reward Responses (i.e., Reward > Punishment/Neutral) in Previous Meta-analyses.

| Brain Region                  | MNI Coordinates |     |     |
|-------------------------------|-----------------|-----|-----|
|                               | x               | y   | z   |
| <i>Groenewold et al. (50)</i> |                 |     |     |
| <i>MDD &gt; HC</i>            |                 |     |     |
| Lingual Gyrus                 | 26              | -92 | -14 |
| Olfactorius Cortex            | 4               | 22  | -14 |
| Middle Orbitofrontal          | 2               | 26  | -14 |
| Rectus                        | 2               | 30  | -24 |
| Middle Orbitofrontal          | 0               | 26  | -12 |
| Rectus                        | 0               | 24  | -24 |
| <i>HC &gt; MDD</i>            |                 |     |     |
| Cerebellum                    | -16             | -74 | -28 |
| Lingual Gyrus                 | -18             | -62 | -6  |
| Fusiform Gyrus                | -22             | -74 | -14 |
| Inferior Occipital Gyrus      | -30             | -80 | -12 |
| Rolandic Operculum            | -40             | -24 | 20  |
| Insula                        | -36             | -24 | 22  |
| Superior Temporal Gyrus       | -40             | -36 | 12  |
| Heschl Gyrus                  | -46             | -16 | 12  |
| Postcentral Gyrus             | -50             | -18 | 18  |
| Supramarginal Gyrus           | -50             | -22 | 18  |
| Anterior Cingulate Cortex     | -2              | 28  | 16  |
| Anterior Cingulate Cortex     | 4               | 32  | 14  |
| Lingual Gyrus                 | -18             | -62 | -6  |
| Cerebellum                    | -6              | -58 | -4  |
| Calcarine Sulcus              | -20             | -54 | 4   |
| Fusiform Gyrus                | -26             | -58 | -12 |
| Precuneus                     | -20             | -52 | 2   |
| Pallidum                      | 18              | 0   | -4  |
| Putamen                       | 28              | -4  | 8   |
| Thalamus                      | 14              | -8  | 0   |
| Insula                        | 38              | 10  | -12 |
| Amygdala                      | 30              | -2  | -12 |
| Caudate                       | 16              | 26  | 6   |
| Fusiform                      | 44              | -62 | -20 |
| Crus Cerebellum               | 44              | -64 | -20 |
| Brain Region                  | TAL Coordinates |     |     |
|                               | x               | y   | z   |
| <i>Zhang et al. (51)</i>      |                 |     |     |
| <i>MDD &gt; HC</i>            |                 |     |     |
| Cuneus                        | 4               | -86 | 18  |
| Cuneus                        | -6              | -86 | 22  |
| Frontal Lobe                  | 20              | 30  | -6  |

|                          |             |     |     |
|--------------------------|-------------|-----|-----|
| Middle Frontal Gyrus     | 40          | 28  | 38  |
| Superior Frontal Gyrus   | -4          | 48  | 32  |
| Fusiform Gyrus           | -48         | -74 | -12 |
| Middle Frontal Gyrus     | -48         | 14  | 30  |
| Lingual Gyrus            | 12          | -52 | 4   |
| Lingual Gyrus            | 14          | -54 | 0   |
| <i>HC &gt; MDD</i>       |             |     |     |
| Caudate                  | -6          | 18  | 4   |
| Caudate                  | -8          | -8  | 10  |
| Thalamus                 | -10         | -12 | 8   |
| Thalamus                 | -14         | -14 | 16  |
| Caudate                  | -12         | -4  | 20  |
| Cerebellum               | 4           | -36 | -4  |
| Cerebellum               | -4          | -42 | 4   |
| Putamen                  | 14          | 8   | 2   |
| Caudate                  | 14          | 14  | 10  |
| Anterior Cingulate       | -8          | 30  | 10  |
| Insula                   | 34          | -4  | 16  |
| Cerebellum               | -6          | -60 | -20 |
| Brain Region             | Coordinates |     |     |
|                          | x           | y   | z   |
| <i>Keren et al. (52)</i> |             |     |     |
| <i>HC &gt; MDD</i>       |             |     |     |
| Caudate Body             | 12          | 14  | 14  |
| Caudate Head             | 6           | 2   | -2  |
| Caudate Body             | -8          | -2  | -18 |

MNI, Montreal Neurological Institute space; MDD, major depressive disorder; HC, healthy controls; TAL, Talairach space. Ventral striatum is the only area implicated in reward processing in MDD relative to HCs across the two previous meta-analyses and the current meta-analysis (see Table 1 for peak coordinates of group differences in neural responses to reward found in the current meta-analysis).

**Table S2.** Characteristics of the Study Samples Included in the Meta-Analysis.

| Study                         | Diagnostic Criteria | MDD Patients |      |          |             |          | Mood States                                                                                                                                                                                                                                                       | Comorbidity | Healthy Controls |          |  |
|-------------------------------|---------------------|--------------|------|----------|-------------|----------|-------------------------------------------------------------------------------------------------------------------------------------------------------------------------------------------------------------------------------------------------------------------|-------------|------------------|----------|--|
|                               |                     | <i>n</i>     | Age  | % Female | % Medicated | <i>n</i> |                                                                                                                                                                                                                                                                   |             | Age              | % Female |  |
| Arrondo <i>et al.</i> (11)    | DSM-IV              | 24           | 33.1 | 29.2%    | 54.2%       | D        | Exclusion of alcohol or drug dependence.                                                                                                                                                                                                                          | 21          | 34.3             | 23.5%    |  |
| Bremner <i>et al.</i> (12)    | DSM-IV              | 18           | 40   | 66.7%    | 0.0%        | D        | Exclusion of organic mental disorders or comorbid psychotic disorders, post-traumatic stress disorder, childhood trauma, alcohol or substance abuse or dependence, or dyslexia. No current or past history of comorbid psychiatric disorders.                     | 9           | 35               | 77.8%    |  |
| Burger <i>et al.</i> (13)     | DSM-IV              | 36           | 40.7 | 61.1%    | 100.0%      | D        | Exclusion of substance dependence. Inclusion of PD, agoraphobia, generalized anxiety disorder, social phobia, obsessive compulsive disorder, post-traumatic stress disorder, somatoform disorder, eating disorder, dysthymia, alcohol abuse, and substance abuse. | 36          | 41.3             | 52.8%    |  |
| Chantiluke <i>et al.</i> (14) | DSM-IV              | 20           | 16.2 | 50.0%    | 0.0%        | D        | Exclusion of major psychiatric disorders.                                                                                                                                                                                                                         | 21          | 16.3             | 52.4%    |  |
| Chase <i>et al.</i> (15)      | DSM-IV              | 40           | 31   | 77.5%    | 77.5%       | D        | No exclusion of psychiatric comorbidities. Inclusion of lifetime comorbid anxiety                                                                                                                                                                                 | 37          | 33.1             | 67.6%    |  |

|                              |        |    |      |       |        |   |                                                                                                                                                                                                                                                                                  |    |      |       |
|------------------------------|--------|----|------|-------|--------|---|----------------------------------------------------------------------------------------------------------------------------------------------------------------------------------------------------------------------------------------------------------------------------------|----|------|-------|
| Demenescu <i>et al.</i> (1)  | DSM-IV | 59 | 36.2 | 66.1% | 23.7%  | D | disorders and substance use disorders.<br>Exclusion of axis I disorders, such as psychotic disorder or dementia, current alcohol or substance abuse.                                                                                                                             | 56 | 39.8 | 60.7% |
| Dichter <i>et al.</i> (16)   | DSM-IV | 19 | 23.6 | 78.9% | 0.0%   | R | Exclusion of current axis I psychopathology.                                                                                                                                                                                                                                     | 19 | 27.9 | 63.2% |
| Elliott <i>et al.</i> (17)   | DSM-IV | 10 | 42.2 | 70.0% | 100.0% | D | Exclusion of current comorbid anxiety disorders, substance abuse or dependence, bipolar disorder, or other psychiatric diagnoses.<br>Inclusion of past history of PD and bulimia.                                                                                                | 11 | 37.6 | 72.7% |
| Engelmann <i>et al.</i> (18) | DSM-IV | 19 | 37.6 | 52.6% | 0.0%   | D | Exclusion of lifetime bipolar disorder, psychotic disorder, obsessive-compulsive disorder, tic disorder, eating disorder, cognitive disorder, substance abuse or dependence in the previous 6 months or positive urine drug screen, or clinically significant suicidal ideation. | 23 | 33.7 | 60.9% |
| Fournier <i>et al.</i> (19)  | DSM-IV | 26 | 30.6 | 69.0% | 69.2%  | D | Exclusion of bipolar disorder, borderline personality disorder, and alcohol/substance use                                                                                                                                                                                        | 28 | 32.6 | 57.0% |

|                                |                   |    |      |       |        |   |                                                                                                                                                                  |    |      |       |
|--------------------------------|-------------------|----|------|-------|--------|---|------------------------------------------------------------------------------------------------------------------------------------------------------------------|----|------|-------|
|                                |                   |    |      |       |        |   | disorder within 2 months before the scan. Inclusion of history of anxiety disorder and substance abuse.                                                          |    |      |       |
| Fu <i>et al.</i> (20) and (21) | DSM-IV            | 19 | 43.2 | 68.4% | 100.0% | D | Exclusion of current axis I disorder and history of substance abuse within 2 months of study participation.                                                      | 19 | 42.8 | 57.9% |
| Fu <i>et al.</i> (22)          | DSM-IV            | 16 | 40   | 81.3% | 0.0%   | D | Exclusion of other axis I disorder, including anxiety disorder or history of substance within 2 months of study participation.                                   | 16 | 39.2 | 81.3% |
| Gotlib <i>et al.</i> (23)      | DSM-IV            | 18 | 35.2 | 72.2% | 50.0%  | D | Exclusion of psychotic ideation, social phobia, PD, mania, or substance abuse in the past 6 months or behavioral indications of possible impaired mental status. | 18 | 30.8 | 72.2% |
| Gradin <i>et al.</i> (24)      | DSM-IV            | 25 | 25.5 | 68.0% | 0.0%   | D | Unspecified                                                                                                                                                      | 25 | 25.4 | 68.0% |
| Hall <i>et al.</i> (25)        | DSM-IV            | 29 | 37.4 | 55.2% | 51.7%  | D | Exclusion of history of alcohol or substance abuse.                                                                                                              | 25 | 37.7 | 55.2% |
| Johnston <i>et al.</i> (26)    | DSM-IV/<br>ICD-10 | 19 | 50.8 | 78.9% | 85.0%  | D | Exclusion of other primary psychiatric disorder and substance misuse.                                                                                            | 21 | 46.1 | 71.4% |
| Keedwell <i>et al.</i> (27)    | ICD-10            | 12 | 43   | 66.7% | 66.7%  | D | Exclusion of other axis I disorder.                                                                                                                              | 12 | 36   | 66.7% |
| Knutson <i>et al.</i> (28)     | DSM-III-R         | 14 | 30.7 | 64.3% | 0.0%   | D | Exclusion of other current axis I disorder.                                                                                                                      | 12 | 28.7 | 66.7% |

|                               |        |    |                        |        |             |   |                                                                                                                                                                                                                                               |    |                        |        |
|-------------------------------|--------|----|------------------------|--------|-------------|---|-----------------------------------------------------------------------------------------------------------------------------------------------------------------------------------------------------------------------------------------------|----|------------------------|--------|
| Kumari <i>et al.</i> (29)     | DSM-IV | 6  | 47                     | 100.0% | Unspecified | D | Unspecified                                                                                                                                                                                                                                   | 6  | 44                     | 100.0% |
| Laurent <i>et al.</i> (30)    | DSM-IV | 11 | 24.1<br>(whole sample) | 100.0% | 23.1%       | D | No exclusion of psychiatric comorbidities. Inclusion of past substance abuse/dependence, anxiety disorders, and eating disorder.                                                                                                              | 11 | 24.1<br>(whole sample) | 100.0% |
| Liu <i>et al.</i> (31)        | DSM-IV | 21 | 30.7                   | 57.1%  | 0.0%        | D | Exclusion of axis I disorders (other than anxiety) and psychotic features and lifetime substance abuse or dependence.                                                                                                                         | 17 | 28.3                   | 58.8%  |
| Murrough <i>et al.</i> (32)   | DSM-IV | 20 | 38.1                   | 44.4%  | 0.0%        | D | Exclusion of lifetime history of psychotic illness or bipolar disorder and current alcohol or substance abuse.                                                                                                                                | 20 | 35                     | 45.0%  |
| Pizzagalli <i>et al.</i> (33) | DSM-IV | 30 | 43.2                   | 50.0%  | 0.0%        | D | Exclusion of other axis I disorder except for anxiety disorders.                                                                                                                                                                              | 31 | 38.8                   | 41.9%  |
| Remijnse <i>et al.</i> (34)   | DSM-IV | 20 | 35                     | 40.0%  | 0.0%        | D | Exclusion of current alcohol or substance abuse at the time of study participation. Inclusion of social anxiety disorder, generalized anxiety disorder, PD without agoraphobia, PD, and cannabis abuse in early and sustained full remission. | 27 | 32                     | 70.4%  |
| Rizvi <i>et al.</i> (35)      | DSM-IV | 21 | 38.9                   | 66.7%  | 0.0%        | D | Exclusion of other primary axis I disorder, lifetime history of                                                                                                                                                                               | 18 | 36.2                   | 66.7%  |



|                                 |        |    |      |        |             |   |                                                                                                                                                                          |    |      |        |
|---------------------------------|--------|----|------|--------|-------------|---|--------------------------------------------------------------------------------------------------------------------------------------------------------------------------|----|------|--------|
|                                 |        |    |      |        |             |   | hypomania/mania, psychosis, obsessive compulsive disorder, or eating disorder, and substance abuse or dependence (except nicotine or caffeine) within the last 3 months. |    |      |        |
| Rosenblau <i>et al.</i> (36)    | DSM-IV | 12 | 43.5 | 41.7%  | 0.0%        | D | Exclusion of other axis I or II disorders.                                                                                                                               | 12 | 45.8 | 41.7%  |
| Scheuerecker <i>et al.</i> (37) | DSM-IV | 13 | 37.9 | 23.1%  | 0.0%        | D | Exclusion of past alcohol or substance abuse, other mental illnesses, and personality disorders.                                                                         | 15 | 35.5 | 33.3%  |
| Schiller <i>et al.</i> (38)     | DSM-IV | 19 | 23.6 | 78.9%  | 0.0%        | R | Exclusion of current axis I psychopathology.                                                                                                                             | 19 | 27.9 | 63.2%  |
| Segarra <i>et al.</i> (39)      | DSM-IV | 24 | 33.1 | 29.2%  | 54.0%       | D | Exclusion of dependence on alcohol or recreational drugs.                                                                                                                | 21 | 34.3 | 19.0%  |
| Sharp <i>et al.</i> (40)        | DSM-IV | 14 | 13.4 | 100.0% | Unspecified | D | Exclusion of current use of nicotine, illicit drugs, psychotic disorders, bipolar I disorder, learning disabilities, and mental retardation.                             | 19 | 13.7 | 100.0% |
| Smoski <i>et al.</i> (41)       | DSM-IV | 14 | 34.8 | 50.0%  | 0.0%        | D | Exclusion of current mood disorder, anxiety disorder, psychotic disorder, substance abuse, or active suicidal ideation and history of psychosis or mania.                | 15 | 30.8 | 60.0%  |

|                               |           |    |      |             |        |   |                                                                                                                                                |    |      |             |
|-------------------------------|-----------|----|------|-------------|--------|---|------------------------------------------------------------------------------------------------------------------------------------------------|----|------|-------------|
| Smoski <i>et al.</i> (42)     | DSM-IV    | 9  | 34.4 | Unspecified | 44.4%  | D | Inclusion of generalized anxiety disorder and binge eating disorder.                                                                           | 13 | 26.2 | Unspecified |
| Surguladze <i>et al.</i> (43) | DSM-IV    | 16 | 42.3 | 37.5%       | 100.0% | D | Exclusion of illicit substance abuse.                                                                                                          | 14 | 35.1 | 42.9%       |
| Surguladze <i>et al.</i> (44) | DSM-IV    | 9  | 42.8 | 44.4%       | 100.0% | D | Exclusion of illicit substance abuse and other axis I disorders.                                                                               | 9  | 39.7 | 44.4%       |
| Townsend <i>et al.</i> (45)   | DSM-IV    | 15 | 45.6 | 40.0%       | 0.0%   | D | Exclusion of comorbid axis I disorder.                                                                                                         | 15 | 44.8 | 40.0%       |
| Wagner <i>et al.</i> (2)      | DSM-IV    | 19 | 39.9 | 55.0%       | 100.0% | D | Exclusion of current comorbid axis I disorder and a history of manic episodes.                                                                 | 20 | 34.1 | 60.0%       |
| Wang <i>et al.</i> (46)       | DSM-IV    | 12 | 69.1 | 58.3%       | 91.7%  | D | Exclusion of another major psychiatric disorder and alcohol/drug abuse/dependence. Inclusion of generalized anxiety disorder.                  | 20 | 73.1 | 60.0%       |
| Young <i>et al.</i> (47)      | DSM-IV-TR | 16 | 37.1 | 87.5%       | 0.0%   | D | Exclusion of serious suicidal ideation, psychosis, drug/alcohol abuse in the past year and dependence (except for nicotine) in their lifetime. | 16 | 37.8 | 87.5%       |
| Zhang <i>et al.</i> (48)      | ICD-10    | 21 | 43.8 | 38.1%       | 100.0% | D | Exclusion of illicit substance use or substance use disorders.                                                                                 | 25 | 39.3 | 36.0%       |
| Zhong <i>et al.</i> (49)      | DSM-IV    | 29 | 20.5 | 55.2%       | 0.0%   | D | Exclusion of lifetime substance dependence and                                                                                                 | 31 | 20.8 | 51.6%       |

substance abuse in the last 6  
months.

---

MDD, major depressive disorder; D, depressed; R, remitted; PD, panic disorder.

**Table S3.** Study Characteristics.

| Study                         | fMRI or PET | Design        | Space | Paradigm                                                                                                                                                     | Correction                                                                | Stimuli              | Contrast                                                                                                                                                                                                                    |
|-------------------------------|-------------|---------------|-------|--------------------------------------------------------------------------------------------------------------------------------------------------------------|---------------------------------------------------------------------------|----------------------|-----------------------------------------------------------------------------------------------------------------------------------------------------------------------------------------------------------------------------|
| Arrondo <i>et al.</i> (11)    | fMRI        | Event-related | MNI   | Modified monetary incentive delay task                                                                                                                       | Uncorrected                                                               | Money                | HC > MDD, Anticipation: Reward > Non-Reward                                                                                                                                                                                 |
| Bremner <i>et al.</i> (12)    | PET         | Block         | MNI   | Verbal declarative memory tasks with neutral paragraph encoding compared to a control condition and sad word pair retrieval compared to a control condition. | Uncorrected at $p < .005$                                                 | Words and paragraphs | MDD > HC, Outcome: Negative > Neutral<br>HC > MDD, Outcome: Negative > Neutral                                                                                                                                              |
| Burger <i>et al.</i> (13)     | fMRI        | Event-related | MNI   | Face matching paradigm                                                                                                                                       | Corrected at $p < .05$ (TFCE)                                             | Faces                | HC > MDD, Outcome: Negative > Neutral<br>HC > MDD, Outcome: Positive > Neutral                                                                                                                                              |
| Chantiluke <i>et al.</i> (14) | fMRI        | Event-related | TAL   | Reward continuous performance task                                                                                                                           | Uncorrected at $p < .005$                                                 | Money                | MDD > HC, Outcome: Reward > Non-Reward<br>HC > MDD, Outcome: Reward > Non-Reward                                                                                                                                            |
| Chase <i>et al.</i> (15)      | fMRI        | Event-related | MNI   | Card guessing paradigm                                                                                                                                       | Voxel-wise corrected at $p < .05$ and cluster-wise corrected at $p < .01$ | Money                | MDD > HC, Anticipation: Reward > Non-Reward<br>HC > MDD, Anticipation: Reward > Non-Reward<br>MDD > HC, Anticipation: Reward Expectancy<br>HC > MDD, Anticipation: Reward Expectancy<br>MDD > HC, Outcome: Prediction Error |

|                                   |      |               |     |                                                                                                                                                                                          |                                         |       |                                                                                                                                 |
|-----------------------------------|------|---------------|-----|------------------------------------------------------------------------------------------------------------------------------------------------------------------------------------------|-----------------------------------------|-------|---------------------------------------------------------------------------------------------------------------------------------|
| Demenescu <i>et al.</i><br>(1)    | fMRI | Event-related | MNI | Viewing faces with angry, fearful, sad, happy, and neutral expressions and scrambled faces; rating gender or pressing buttons in conformity with the instruction presented on the screen | Cluster-wise corrected at $p < .05$     | Faces | MDD > HC, Outcome: Positive > Scrambled Face                                                                                    |
| Dichter <i>et al.</i><br>(16)     | fMRI | Event-related | MNI | Modified monetary incentive delay task                                                                                                                                                   | Uncorrected at $p < .005$ , $k \geq 10$ | Money | MDD > HC, Anticipation: Reward > Non-Reward<br>MDD > HC, Outcome: Reward > Non-Reward<br>HC > MDD, Outcome: Reward > Non-Reward |
| Elliott <i>et al.</i> (17)        | fMRI | Block         | MNI | Affective go/no go task                                                                                                                                                                  | Uncorrected at $p < .001$               | Words | MDD > HC, Outcome: Negative > Positive<br>HC > MDD, Outcome: Positive > Negative                                                |
| Engelmann <i>et al.</i><br>(18)   | fMRI | Event-related | MNI | Economic decision-making task                                                                                                                                                            | Cluster-wise corrected at $p < .05$     | Money | MDD > HC, Outcome: Negative > Positive                                                                                          |
| Fournier <i>et al.</i><br>(19)    | fMRI | Block         | MNI | Labeling a color flash superimposed upon neutral faces that gradually morphed into angry, fearful, sad, or happy faces                                                                   | Uncorrected at $p < .001$ , $k > 20$    | Faces | MDD > HC, Outcome: Negative > Neutral<br>MDD > HC, Outcome: Positive > Neutral                                                  |
| Fu <i>et al.</i> (20) and<br>(21) | fMRI | Event-related | TAL | Indicating the sex of faces morphed to represent low,                                                                                                                                    | Cluster-wise corrected at $p < .005$    | Faces | MDD > HC, Outcome: Negative (low, medium, and high intensity)                                                                   |

|                           |      |               |     |                                                                                               |                                     |       |                                                                                                                                                                                                                                                                        |
|---------------------------|------|---------------|-----|-----------------------------------------------------------------------------------------------|-------------------------------------|-------|------------------------------------------------------------------------------------------------------------------------------------------------------------------------------------------------------------------------------------------------------------------------|
| Fu <i>et al.</i> (22)     | fMRI | Event-related | TAL | Indicating the sex of faces morphed to represent low, medium, and high intensities of sadness | Unspecified                         | Faces | <p>medium, and high intensities of sadness</p> <p>HC &gt; MDD, Outcome: Positive (low, medium, and high intensity)</p> <p>MDD &gt; HC, Outcome: Negative (low, medium, and high intensity)</p> <p>HC &gt; MDD, Outcome: Negative (low, medium, and high intensity)</p> |
| Gotlib <i>et al.</i> (23) | fMRI | Block         | MNI | Indicating the sex of faces that were fearful, angry, sad, happy, neutral, or scrambled       | Uncorrected at $p < .001$ , $k > 5$ | Faces | <p>MDD &gt; HC, Outcome: Negative &gt; Neutral</p> <p>HC &gt; MDD, Outcome: Negative &gt; Neutral</p> <p>MDD &gt; HC, Outcome: Positive &gt; Neutral</p> <p>HC &gt; MDD, Outcome: Positive &gt; Neutral</p>                                                            |
| Gradin <i>et al.</i> (24) | fMRI | Event-related | MNI | Ultimatum game                                                                                | Cluster-wise corrected at $p < .05$ | Money | <p>HC &gt; MDD, Outcome: Increasing fairness (decreasing inequality)</p> <p>MDD &gt; HC, Outcome: Increasing inequality (decreasing fairness)</p>                                                                                                                      |
| Hall <i>et al.</i> (25)   | fMRI | Event-related | TAL | Contingency reversal reward paradigm                                                          | Voxel-wise corrected at $p < .05$   | Money | <p>HC &gt; MDD, Outcome: Magnitude of Loss: Large Loss &gt; Small Loss</p> <p>HC &gt; MDD, Outcome: Magnitude of Reward: Large Reward &gt; Small Reward</p> <p>MDD &gt; HC, Outcome: Reward Acquisition &gt; Punishment Reversal</p>                                   |

|                                |      |               |     |                                                                                                |                                      |                                   |                                                                                                                                                                                                                             |
|--------------------------------|------|---------------|-----|------------------------------------------------------------------------------------------------|--------------------------------------|-----------------------------------|-----------------------------------------------------------------------------------------------------------------------------------------------------------------------------------------------------------------------------|
| Johnston <i>et al.</i><br>(26) | fMRI | Event-related | MNI | Modified Pessiglione task                                                                      | Cluster-wise corrected at $p < .01$  | Voucher                           | HC > MDD, Outcome: Reward Acquisition > Punishment Reversal<br>MDD > HC, Outcome: Loss > Non-Loss<br>HC > MDD, Outcome: Loss > Non-Loss<br>MDD > HC, Outcome: Reward > Non-Reward<br>HC > MDD, Outcome: Reward > Non-Reward |
| Keedwell <i>et al.</i><br>(27) | fMRI | Block         | TAL | Being exposed to happy, sad, or neutral autobiographical memory prompts and facial expressions | Cluster-wise corrected at $p < .01$  | Autobiographical memory and faces | MDD > HC, Outcome: Negative > Neutral<br>HC > MDD, Outcome: Negative > Neutral<br>MDD > HC, Outcome: Positive > Neutral<br>HC > MDD, Outcome: Positive > Neutral                                                            |
| Knutson <i>et al.</i><br>(28)  | fMRI | Event-related | TAL | Monetary incentive delay task                                                                  | Uncorrected at $p < .05$             | Money                             | MDD > HC, Anticipation: Reward > Non-Reward<br>HC > MDD, Anticipation: Reward > Non-Reward<br>HC > MDD, Outcome: Non-Loss > Loss<br>HC > MDD, Outcome: Reward > Non-Reward                                                  |
| Kumari <i>et al.</i><br>(29)   | fMRI | Block         | TAL | Viewing positive or negative pictures with a caption                                           | Cluster-wise corrected at $p < .005$ | Pictures and captions             | HC > MDD, Outcome: Negative > Neutral<br>MDD > HC, Outcome: Negative > Neutral                                                                                                                                              |

|                                  |      |               |     |                                                                                   |                                     |       |                                                                                                                                                                                                                                                              |
|----------------------------------|------|---------------|-----|-----------------------------------------------------------------------------------|-------------------------------------|-------|--------------------------------------------------------------------------------------------------------------------------------------------------------------------------------------------------------------------------------------------------------------|
| Laurent <i>et al.</i><br>(30)    | fMRI | Event-related | MNI | Seeing own infant vs. other infant distress faces                                 | Cluster-wise corrected at $p < .05$ | Faces | HC > MDD, Outcome: Positive > Neutral<br>MDD > HC, Outcome: Positive > Neutral<br>HC > MDD, Outcome: Positive > Negative<br>MDD > HC, Outcome: Positive > Negative<br>HC > MDD, Outcome: Very negative > Negative                                            |
| Liu et al. (31)                  | fMRI | Event-related | MNI | Instrumental probabilistic reward- and punishment-based associative learning task | Cluster-wise corrected at $p < .05$ | Money | MDD > HC, Outcome: Negative > Neutral<br>MDD > HC, Outcome: Punishment Prediction Errors                                                                                                                                                                     |
| Murrough <i>et al.</i><br>(32)   | fMRI | Event-related | MNI | Rating emotional valence of happy, sad, or neutral faces                          | Cluster-wise corrected at $p < .05$ | Faces | HC > MDD, Outcome: 100% Positive > Neutral                                                                                                                                                                                                                   |
| Pizzagalli <i>et al.</i><br>(33) | fMRI | Event-related | MNI | Monetary incentive delay task                                                     | Uncorrected at $p < .005$           | Money | MDD > HC, Anticipation: Loss > Non-Loss<br>HC > MDD, Anticipation: Loss > Non-Loss<br>MDD > HC, Anticipation: Reward > Non-Reward<br>HC > MDD, Anticipation: Reward > Non-Reward<br>MDD > HC, Outcome: Loss > Non-Loss<br>HC > MDD, Outcome: Loss > Non-Loss |



|                                 |      |               |     |                                                                                                                                           |                                        |          |                                                                                                                                                                                                      |
|---------------------------------|------|---------------|-----|-------------------------------------------------------------------------------------------------------------------------------------------|----------------------------------------|----------|------------------------------------------------------------------------------------------------------------------------------------------------------------------------------------------------------|
| Remijnse <i>et al.</i> (34)     | fMRI | Event-related | MNI | Reversal learning task                                                                                                                    | Uncorrected $p < .001$                 | Points   | MDD > HC, Outcome: Reward > Non-Reward<br>HC > MDD, Outcome: Reward > Non-Reward<br>MDD > HC, Outcome: Loss > Baseline<br>HC > MDD, Outcome: Loss > Baseline<br>MDD > HC, Outcome: Reward > Baseline |
| Rizvi <i>et al.</i> (35)        | fMRI | Blocked       | MNI | Viewing IAPS pictures that elicit positive, negative or neutral affective states                                                          | Cluster-wise corrected at $p < .05$    | Pictures | MDD > HC, Outcome: Positive > Neutral<br>MDD > HC, Outcome: Negative > Neutral                                                                                                                       |
| Rosenblau <i>et al.</i> (36)    | fMRI | Event-related | MNI | Viewing IAPS pictures that elicit positive, negative or neutral affective states with and without cues indicating their emotional valence | Uncorrected at $p < .05$ or $p < .005$ | Pictures | MDD > HC, Anticipation: Negative > Neutral<br>MDD > HC, Outcome: Negative > Neutral                                                                                                                  |
| Scheuerecker <i>et al.</i> (37) | fMRI | Block         | MNI | Face matching paradigm                                                                                                                    | Uncorrected at $p < .001$              | Faces    | MDD > HC, Outcome: Negative > Neutral                                                                                                                                                                |
| Schiller <i>et al.</i> (38)     | fMRI | Event-related | MNI | Monetary incentive delay task                                                                                                             | Cluster-wise corrected at $p < .05$    | Money    | HC > MDD, Anticipation: Loss > Non-Loss<br>HC > MDD, Outcome: Loss > Non-Loss                                                                                                                        |
| Segarra <i>et al.</i> (39)      | fMRI | Event-related | MNI | Simulated slot-machine game                                                                                                               | Cluster-wise corrected at $p < .05$    | Money    | HC > MDD, Outcome: Unexpected Reward > Full Miss                                                                                                                                                     |
| Sharp <i>et al.</i> (40)        | fMRI | Event-related | TAL | Card guessing paradigm                                                                                                                    | Uncorrected at $p < .005$              | Money    | HC > MDD, Outcome: Reward > Non-Reward                                                                                                                                                               |

|                                  |      |               |     |                                                                                                                       |                                         |       |                                                                                                                                                                                                                                                                                                                                                |
|----------------------------------|------|---------------|-----|-----------------------------------------------------------------------------------------------------------------------|-----------------------------------------|-------|------------------------------------------------------------------------------------------------------------------------------------------------------------------------------------------------------------------------------------------------------------------------------------------------------------------------------------------------|
| Smoski <i>et al.</i><br>(42)     | fMRI | Event-related | MNI | Modified monetary incentive delay task                                                                                | Cluster-wise corrected                  | Money | MDD > HC, Anticipation:<br>Money > Control<br>HC > MDD, Anticipation:<br>Money > Control<br>MDD > HC, Outcome: Non-Win > Control<br>HC > MDD, Outcome: Non-Win > Control<br>MDD > HC, Outcome:<br>Winning > Control<br>HC > MDD, Outcome:<br>Winning > Control<br>MDD > HC, Selection: Money > Control<br>HC > MDD, Selection: Money > Control |
| Smoski <i>et al.</i><br>(41)     | fMRI | Event-related | MNI | Wheel of fortune task                                                                                                 | Uncorrected at $p < .005$ , $k \geq 10$ | Money | HC > MDD, Anticipation:<br>Reward > Non-Reward<br>HC > MDD, Outcome: Reward > Non-Reward                                                                                                                                                                                                                                                       |
| Surguladze <i>et al.</i><br>(44) | fMRI | Event-related | TAL | Indicating the sex of neutral faces and faces morphed to represent mild and high intensities of fear and disgust      | Cluster-wise corrected at $p < .001$    | Faces | HC > MDD, Outcome:<br>Increasing intensities of happy faces<br>MDD > HC, Outcome:<br>Increasing intensities of sad faces                                                                                                                                                                                                                       |
| Surguladze <i>et al.</i><br>(43) | fMRI | Event-related | TAL | Indicating the sex of neutral faces and faces morphed to represent mild and high intensities of sadness and happiness | Cluster-wise corrected at $p < .001$    | Faces | MDD > HC, Outcome:<br>Differential response to 100% disgust<br>HC > MDD, Outcome:<br>Differential response to 50% fear                                                                                                                                                                                                                         |

|                             |      |               |     |                                                                                    |                                                 |                                     |                                                                                                                                           |
|-----------------------------|------|---------------|-----|------------------------------------------------------------------------------------|-------------------------------------------------|-------------------------------------|-------------------------------------------------------------------------------------------------------------------------------------------|
| Townsend <i>et al.</i> (45) | fMRI | Block         | MNI | Face matching paradigm                                                             | Cluster-wise corrected at $p < .05$             | Faces                               | HC > MDD, Outcome: Negative > Neutral                                                                                                     |
| Wagner <i>et al.</i> (48)   | fMRI | Event-related | MNI | Self-referential processing task                                                   | Cluster-wise corrected at $p < .05$             | Statements                          | MDD > HC, Outcome: Neutral > Negative<br>MDD > HC, Outcome: Neutral > Positive                                                            |
| Wang <i>et al.</i> (46)     | fMRI | Event-related | MNI | Emotional oddball task                                                             | Uncorrected at $p < .001$ , $k = 5$             | Pictures                            | MDD > HC, Outcome: Negative > Neutral                                                                                                     |
| Young <i>et al.</i> (47)    | fMRI | Event-related | TAL | Autobiographical memory task                                                       | Cluster-wise corrected at $p < .05$ , $k > 30$  | Words and autobiographical memories | HC > MDD, Outcome: Very Positive > Positive<br>HC > MDD, Outcome: Very Negative > Negative<br>MDD > HC, Outcome: Very Negative > Negative |
| Zhang <i>et al.</i> (48)    | fMRI | Event-related | MNI | Viewing IAPS positive, neutral, and negative pictures with or without valence cues | Cluster-wise corrected at $p < .05$ , $k > 157$ | Pictures                            | MDD > HC, Outcome: Reward > Non-Reward                                                                                                    |
| Zhong <i>et al.</i> (49)    | fMRI | Block         | MNI | Face matching paradigm                                                             | Uncorrected at $p < .005$ , $k = 8$             | Faces                               | MDD > HC, Outcome: Negative > Neutral<br>HC > MDD, Outcome: Negative > Neutral                                                            |

---

fMRI, functional magnetic resonance imaging; PET, positron emission tomography; MNI, Montreal Neurological Institute space; SVC, small volume correction; MDD, major depressive disorder; HC, healthy controls; TFCE, threshold-free cluster enhancement; TAL, Talairach space; VS, ventral striatum; dACC, dorsal anterior cingulate cortex; rACC, rostral anterior cingulate cortex; ACC, anterior cingulate cortex; mPFC, medial prefrontal cortex; mOFC, medial orbitofrontal cortex; IAPS, International Affective Picture System.

**Table S4.** Peak Coordinates of Group Differences in Neural Responses to Reward (Excluding Neutral Stimuli > Punishment).

| Contrast | Cluster Size (mm <sup>3</sup> ) | Probabilistic Anatomical Label                                    | x       | y      | z        |
|----------|---------------------------------|-------------------------------------------------------------------|---------|--------|----------|
| MDD > HC | 968                             | Frontal Orbital Cortex (26%),<br>Frontal Pole (13%)               | 20      | 32     | -12      |
| HC > MDD | 1784                            | Subcallosal Cortex (14%)<br>Caudate (32.1%),<br>Accumbens (11.1%) | -2<br>8 | 8<br>6 | -4<br>-2 |

Coordinates are x,y,z values of the locations of the maximum activation likelihood estimation (ALE) values in MNI space. Probabilistic labels reflect the probability that a coordinate belongs to a given region derived from the Harvard-Oxford probabilistic atlas. For clarity, we only report labels whose likelihood exceeds 5%. MDD, major depressive disorder; HC, healthy controls.

**Table S5.** Peak Coordinates of Group Differences in Neural Responses to Punishment.

| Contrast | Cluster Size (mm <sup>3</sup> ) | Probabilistic Anatomical Label | x   | y  | z   |
|----------|---------------------------------|--------------------------------|-----|----|-----|
| MDD > HC | 1104                            | Amygdala (85.4%)               | -26 | -8 | -14 |
|          |                                 | Amygdala (61.4%)               | -16 | -2 | -18 |

Coordinates are x,y,z values of the locations of the maximum activation likelihood estimation (ALE) values in MNI space. Probabilistic labels reflect the probability that a coordinate belongs to a given region derived from the Harvard-Oxford probabilistic atlas. For clarity, we only report labels whose likelihood exceeds 5%. MDD, major depressive disorder; HC, healthy controls.

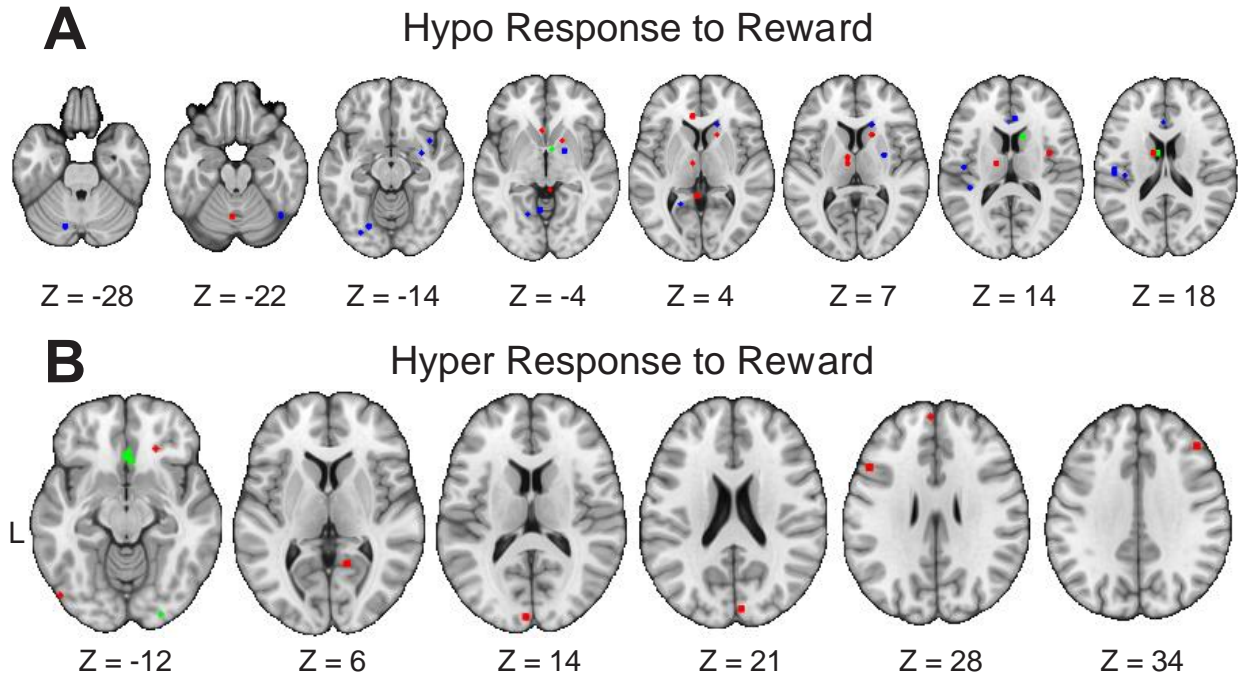

**Figure S1.** Illustration of Findings of Previous Meta-analyses on Reward Processing in Unipolar Depression. There is a striking degree of anatomical disagreement across these meta-analyses, with non-overlapping findings all throughout the brain. Blue represents Groenewold et al. (50). Green represents Keren et al. (52). Red represents Zhang et al. (51). **(A)** Previous meta-analyses examining convergence among studies reporting hypo-responses to reward include Groenewold et al. (50), Keren et al. (52), and Zhang et al. (51). **(B)** Previous meta-analyses examining convergence among studies reporting hyper-responses to reward include Groenewold et al. (50) and Zhang et al. (51).

## Hyper Response to Punishment in the SLEA

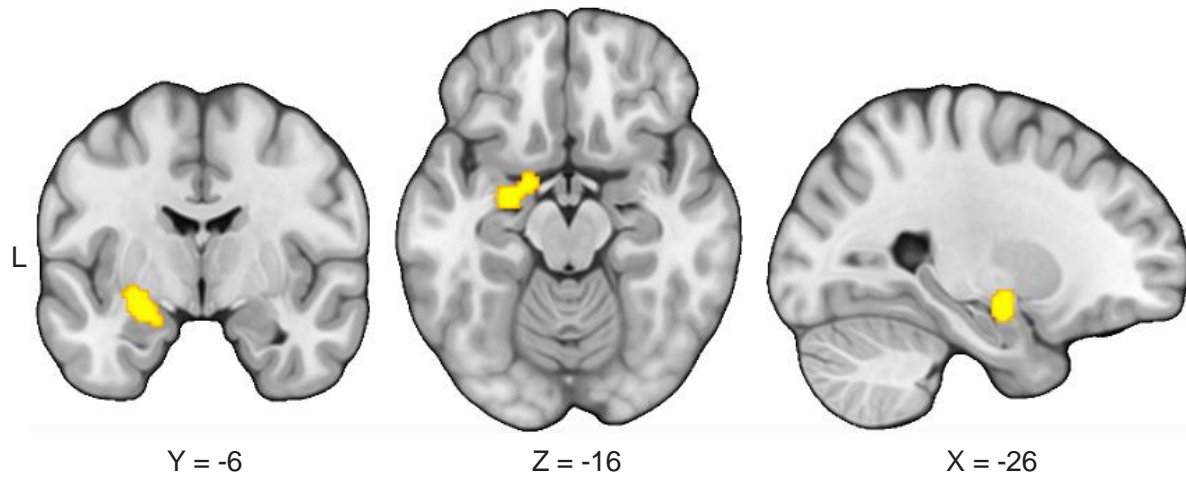

**Figure S2.** Hyper-responses to punishment in the sublentiform extended amygdala (SLEA) in major depressive disorder (MDD). To conduct exploratory analyses to examine which brain regions consistently show elevated response to punishment in MDD relative to healthy controls (HCs), we meta-analyzed 24 studies reporting greater activity in response to punishment in people with MDD than HCs. Our results indicated that these studies reliably report greater activation in the left SLEA in MDD.

## Supplementary References

1. Demenescu LR, Renken R, Korteckaas R, van Tol M-J, Marsman JBC, van Buchem MA, *et al.* (2011): Neural correlates of perception of emotional facial expressions in out-patients with mild-to-moderate depression and anxiety. A multicenter fMRI study. *Psychol Med.* 41: 2253–2264.
2. Wagner G, Schachtzabel C, Peikert G, Bär K-J (2015): The neural basis of the abnormal self-referential processing and its impact on cognitive control in depressed patients. *Hum Brain Mapp.* 36: 2781–2794.
3. Roiser JP, Elliott R, Sahakian BJ (2012): Cognitive Mechanisms of Treatment in Depression. *Neuropsychopharmacology.* 37: 117–136.
4. Eshel N, Roiser JP (2010): Reward and Punishment Processing in Depression. *Biol Psychiatry*, Vascular Function in Depression in Older Adults. 68: 118–124.
5. Hamilton JP, Etkin A, Furman DJ, Lemus MG, Johnson RF, Gotlib IH (2012): Functional neuroimaging of major depressive disorder: a meta-analysis and new integration of base line activation and neural response data. *Am J Psychiatry.* 169: 693–703.
6. Price JL, Drevets WC (2010): Neurocircuitry of Mood Disorders. *Neuropsychopharmacology.* 35: 192–216.
7. Rive MM, van Rooijen G, Veltman DJ, Phillips ML, Schene AH, Ruhé HG (2013): Neural correlates of dysfunctional emotion regulation in major depressive disorder. A systematic review of neuroimaging studies. *Neurosci Biobehav Rev.* 37: 2529–2553.
8. Phillips ML, Drevets WC, Rauch SL, Lane R (2003): Neurobiology of emotion perception II: Implications for major psychiatric disorders. *Biol Psychiatry.* 54: 515–528.



9. Swartz JR, Knodt AR, Radtke SR, Hariri AR (2015): A Neural Biomarker of Psychological Vulnerability to Future Life Stress. *Neuron*. 85: 505–511.
10. Mattson WI, Hyde LW, Shaw DS, Forbes EE, Monk CS (2016): Clinical neuroprediction: Amygdala reactivity predicts depressive symptoms 2 years later. *Soc Cogn Affect Neurosci*. 11: 892–898.
11. Arrondo G, Segarra N, Metastasio A, Ziauddeen H, Spencer J, Reinders NR, *et al.* (2015): Reduction in ventral striatal activity when anticipating a reward in depression and schizophrenia: a replicated cross-diagnostic finding. *Front Psychol*. 6. doi: 10.3389/fpsyg.2015.01280.
12. Bremner JD, Vythilingam M, Vermetten E, Charney DS (2007): Effects of antidepressant treatment on neural correlates of emotional and neutral declarative verbal memory in depression. *J Affect Disord*. 101: 99–111.
13. Bürger C, Redlich R, Grotegerd D, Meinert S, Dohm K, Schneider I, *et al.* (2017): Differential Abnormal Pattern of Anterior Cingulate Gyrus Activation in Unipolar and Bipolar Depression: an fMRI and Pattern Classification Approach. *Neuropsychopharmacology*. 42: 1399–1408.
14. Chantiluke K, Halari R, Simic M, Pariante CM, Papadopoulos A, Giampietro V, Rubia K (2012): Fronto-Striato-Cerebellar Dysregulation in Adolescents with Depression During Motivated Attention. *Biol Psychiatry*, Molecular Substrates of Neuroplasticity in Depression. 71: 59–67.
15. Chase HW, Nusslock R, Almeida JRC, Forbes EE, LaBarbara EJ, Phillips ML (2013): Dissociable patterns of abnormal frontal cortical activation during anticipation of an

- uncertain reward or loss in bipolar versus major depression. *Bipolar Disord.* 15: 839–854.
16. Dichter GS, Kozink RV, McClernon FJ, Smoski MJ (2012): Remitted major depression is characterized by reward network hyperactivation during reward anticipation and hypoactivation during reward outcomes. *J Affect Disord.* 136: 1126–1134.
17. Elliott R, Rubinsztein JS, Sahakian BJ, Dolan RJ (2002): The Neural Basis of Mood-Congruent Processing Biases in Depression. *Arch Gen Psychiatry.* 59: 597–604.
18. Engelmann JB, Berns GS, Dunlop BW (2017): Hyper-responsivity to losses in the anterior insula during economic choice scales with depression severity. *Psychol Med.* 47: 2879–2891.
19. Fournier JC, Keener MT, Mullin BC, Hafeman DM, LaBarbara EJ, Stiffler RS, *et al.* (2013): Heterogeneity of Amygdala Response in Major Depressive Disorder: The Impact of Lifetime Sub-Threshold Mania. *Psychol Med.* 43: 293–302.
20. Fu CHY, Williams SCR, Cleare AJ, Brammer MJ, Walsh ND, Kim J, *et al.* (2004): Attenuation of the neural response to sad faces in major depression by antidepressant treatment: a prospective, event-related functional magnetic resonance imaging study. *Arch Gen Psychiatry.* 61: 877–889.
21. Fu CHY, Williams SCR, Brammer MJ, Suckling J, Kim J, Cleare AJ, *et al.* (2007): Neural responses to happy facial expressions in major depression following antidepressant treatment. *Am J Psychiatry.* 164: 599–607.
22. Fu CHY, Williams SCR, Cleare AJ, Scott J, Mitterschiffthaler MT, Walsh ND, *et al.* (2008): Neural responses to sad facial expressions in major depression following cognitive behavioral therapy. *Biol Psychiatry.* 64: 505–512.

23. Gotlib IH, Sivers H, Gabrieli JDE, Whitfield-Gabrieli S, Goldin P, Minor KL, Canli T (2005): Subgenual anterior cingulate activation to valenced emotional stimuli in major depression. *Neuroreport*. 16: 1731–1734.
24. Gradin VB, Pérez A, MacFarlane JA, Cavin I, Waiter G, Engelmann J, *et al.* (2015): Abnormal brain responses to social fairness in depression: an fMRI study using the Ultimatum Game. *Psychol Med*. 45: 1241–1251.
25. Hall GBC, Milne AMB, MacQueen GM (2014): An fMRI study of reward circuitry in patients with minimal or extensive history of major depression. *Eur Arch Psychiatry Clin Neurosci*. 264: 187–198.
26. Johnston BA, Tolomeo S, Gradin V, Christmas D, Matthews K, Steele JD (2015): Failure of hippocampal deactivation during loss events in treatment-resistant depression. *Brain J Neurol*. 138: 2766–2776.
27. Keedwell PA, Andrew C, Williams SCR, Brammer MJ, Phillips ML (2005): A double dissociation of ventromedial prefrontal cortical responses to sad and happy stimuli in depressed and healthy individuals. *Biol Psychiatry*. 58: 495–503.
28. Knutson B, Bhanji JP, Cooney RE, Atlas LY, Gotlib IH (2008): Neural responses to monetary incentives in major depression. *Biol Psychiatry*. 63: 686–692.
29. Kumari V, Mitterschiffthaler MT, Teasdale JD, Malhi GS, Brown RG, Giampietro V, *et al.* (2003): Neural abnormalities during cognitive generation of affect in treatment-resistant depression. *Biol Psychiatry*. 54: 777–791.
30. Laurent HK, Ablow JC (2013): A Face a Mother Could Love: Depression-Related Maternal Neural Responses to Infant Emotion Faces. *Soc Neurosci*. 8: 228–239.

31. Liu W-H, Valton V, Wang L-Z, Zhu Y-H, Roiser JP (2017): Association between habenula dysfunction and motivational symptoms in unmedicated major depressive disorder. *Soc Cogn Affect Neurosci.* 12: 1520–1533.
32. Murrough JW, Collins KA, Fields J, DeWilde KE, Phillips ML, Mathew SJ, *et al.* (2015): Regulation of neural responses to emotion perception by ketamine in individuals with treatment-resistant major depressive disorder. *Transl Psychiatry.* 5: e509.
33. Pizzagalli DA, Holmes AJ, Dillon DG, Goetz EL, Birk JL, Bogdan R, *et al.* (2009): Reduced Caudate and Nucleus Accumbens Response to Rewards in Unmedicated Subjects with Major Depressive Disorder. *Am J Psychiatry.* 166: 702–710.
34. Remijnse PL, Nielen MMA, van Balkom AJLM, Hendriks G-J, Hoogendijk WJ, Uylings HBM, Veltman DJ (2009): Differential frontal-striatal and paralimbic activity during reversal learning in major depressive disorder and obsessive-compulsive disorder. *Psychol Med.* 39: 1503–1518.
35. Rizvi SJ, Salomons TV, Konarski JZ, Downar J, Giacobbe P, McIntyre RS, Kennedy SH (2013): Neural response to emotional stimuli associated with successful antidepressant treatment and behavioral activation. *J Affect Disord.* 151: 573–581.
36. Rosenblau G, Sterzer P, Stoy M, Park S, Friedel E, Heinz A, *et al.* (2012): Functional neuroanatomy of emotion processing in major depressive disorder is altered after successful antidepressant therapy. *J Psychopharmacol (Oxf).* 26: 1424–1433.
37. Scheuerecker J, Meisenzahl EM, Koutsouleris N, Roesner M, Schöpf V, Linn J, *et al.* (2010): Orbitofrontal volume reductions during emotion recognition in patients with major depression. *J Psychiatry Neurosci JPN.* 35: 311–320.

38. Schiller CE, Minkel J, Smoski MJ, Dichter GS (2013): Remitted Major Depression is Characterized by Reduced Prefrontal Cortex Reactivity to Reward Loss. *J Affect Disord.* 151: 756–762.
39. Segarra N, Metastasio A, Ziauddeen H, Spencer J, Reinders NR, Dudas RB, *et al.* (2016): Abnormal Frontostriatal Activity During Unexpected Reward Receipt in Depression and Schizophrenia: Relationship to Anhedonia. *Neuropsychopharmacology.* 41: 2001–2010.
40. Sharp C, Kim S, Herman L, Pane H, Reuter T, Strathearn L (2014): Major depression in mothers predicts reduced ventral striatum activation in adolescent female offspring with and without depression. *J Abnorm Psychol.* 123: 298–309.
41. Smoski MJ, Rittenberg A, Dichter GS (2011): Major depressive disorder is characterized by greater reward network activation to monetary than pleasant image rewards. *Psychiatry Res.* 194: 263–270.
42. Smoski MJ, Felder J, Bizzell J, Green SR, Ernst M, Lynch TR, Dichter GS (2009): FMRI of Alterations in Reward Selection, Anticipation, and Feedback in Major Depressive Disorder. *J Affect Disord.* 118: 69–78.
43. Surguladze SA, El-Hage W, Dalgleish T, Radua J, Gohier B, Phillips ML (2010): Depression is associated with increased sensitivity to signals of disgust: a functional magnetic resonance imaging study. *J Psychiatr Res.* 44: 894–902.
44. Surguladze SA, Brammer MJ, Keedwell P, Giampietro V, Young AW, Travis MJ, *et al.* (2005): A differential pattern of neural response toward sad versus happy facial expressions in major depressive disorder. *Biol Psychiatry.* 57: 201–209.

45. Townsend JD, Eberhart NK, Bookheimer SY, Eisenberger NI, Folland-Ross LC, Cook IA, *et al.* (2010): fMRI activation in amygdala and orbitofrontal cortex in unmedicated subjects with major depressive disorder. *Psychiatry Res.* 183: 209–217.
46. Wang L, Krishnan KR, Steffens DC, Potter GG, Dolcos F, McCarthy G (2008): Depressive state- and disease-related alterations in neural responses to affective and executive challenges in geriatric depression. *Am J Psychiatry.* 165: 863–871.
47. Young KD, Bodurka J, Drevets WC (2016): Differential neural correlates of autobiographical memory recall in bipolar and unipolar depression. *Bipolar Disord.* 18: 571–582.
48. Zhang B, Li S, Zhuo C, Li M, Safron A, Genz A, *et al.* (2017): Altered task-specific deactivation in the default mode network depends on valence in patients with major depressive disorder. *J Affect Disord.* 207: 377–383.
49. Zhong M, Wang X, Xiao J, Yi J, Zhu X, Liao J, *et al.* (2011): Amygdala hyperactivation and prefrontal hypoactivation in subjects with cognitive vulnerability to depression. *Biol Psychol.* 88: 233–242.
50. Groenewold NA, Opmeer EM, de Jonge P, Aleman A, Costafreda SG (2013): Emotional valence modulates brain functional abnormalities in depression: Evidence from a meta-analysis of fMRI studies. *Neurosci Biobehav Rev.* 37: 152–163.
51. Zhang WN, Chang SH, Guo LY, Zhang KL, Wang J (2013): The neural correlates of reward-related processing in major depressive disorder: A meta-analysis of functional magnetic resonance imaging studies. *J Affect Disord.* 151: 531–539.

52. Keren H, O'Callaghan G, Vidal-Ribas P, Buzzell GA, Brotman MA, Leibenluft E, *et al.*  
(2018): Reward Processing in Depression: A Conceptual and Meta-Analytic Review  
Across fMRI and EEG Studies. *Am J Psychiatry*. appi.ajp.2018.17101124.
